# Supplementary material for: Targeted school‐based interventions for improving reading and mathematics for students with or at risk of academic difficulties in Grades K‐6: A systematic review
Source: PubMed Central journal article supplement (PMC8356298; doi:10.1002/cl2.1152), 2021-04-06
Supplement: CL2-17-e1152-s001.pdf [file CL2-17-e1152-s001.pdf]

---

## Online Appendix E: Description of comparison designs

---

Table B1 describes the comparison designs in terms of country, test subject, and the two or more alternative interventions the studies examined (i.e., the “Contrast”-column in the table). Note that the table also includes two studies, which contained contrasts from both intervention-control and comparison designs and the three additional comparison designs, which we included in the meta-analysis of group sizes. That is, the below table contains both 104 comparison designs we did not use in any meta-analysis and the 5 studies that we used in at least one meta-analysis.

*Table B1. Comparison designs*

| <b>Authors</b>            | <b>Country</b> | <b>Test subject</b> | <b>Contrast</b>                                                                                                                                                                                                                                                          |
|---------------------------|----------------|---------------------|--------------------------------------------------------------------------------------------------------------------------------------------------------------------------------------------------------------------------------------------------------------------------|
| Abbott & Berninger (1999) | US             | Reading             | Compares structural analysis and alphabet principle training (Structural Analysis) with only alphabetic principle training (Study Skills).                                                                                                                               |
| Anthony (2016)            | US             | Math, reading       | Compares CAI in phonological awareness delivered by Earobics Step 1 with CAI in mathematics delivered by Building Blocks.                                                                                                                                                |
| Baker et al. (2012)       | US             | Reading             | Compares ‘bilingual programs’ (daily reading instructions in Spanish and English) and an English-only reading program for Spanish-speaking ELs.                                                                                                                          |
| Baroody et al. (2013)     | US             | Math                | Compares computer-assisted structured discovery of the add-1 rule with unstructured discovery learning of this regularity.                                                                                                                                               |
| Berninger et al. (2000)   | US             | Reading             | This 3-layer intervention varies across intervention groups in the second layer. 7 treatment groups receive different combinations of single or multiple approaches to reading and spelling instructions built on connections between units of written and spoken words. |
| Brailsford et al. (1984)  | Canada         | Reading             | Compares cognitive strategy training with remedial reading.                                                                                                                                                                                                              |
| Brown et al. (2005)       | US             | Reading             | Compares one-to-one tutoring lessons with small-group reading intervention.                                                                                                                                                                                              |
| Brush (1997)              | US             | Math                | Compares students who were paired either homogeneously or heterogeneously based on ability. Students were asked to complete math activities delivered by an integrated learning system.                                                                                  |
| Burns (2012)              | US             | Reading             | Compares a systematic transition intervention designed for Spanish-speaking ELLs with the standard school-based intervention. Both conditions receive small-group instruction as a supplement to their core reading program.                                             |
| Bussjaeger (1993)         | US             | Reading             | Compares Project Read phonology instruction with literature-based instruction.                                                                                                                                                                                           |

---

| <b>Authors</b>                  | <b>Country</b> | <b>Test subject</b> | <b>Contrast</b>                                                                                                                                                                                                                                                                 |
|---------------------------------|----------------|---------------------|---------------------------------------------------------------------------------------------------------------------------------------------------------------------------------------------------------------------------------------------------------------------------------|
| Cantrell et al. (2014)          | US             | Reading             | Both groups benefit from a school-wide model that involves professional development for all content teachers in content area literacy. The experimental group also receive a targeted intervention (Learning Strategies Curriculum).                                            |
| Caputo (2007)                   | US             | Math                | Compares the Accelerated Math Program with Delaware Procedural Fluency Workbook Program.                                                                                                                                                                                        |
| Cook & Welch (1980)             | US             | Reading             | Compares three treatments: Auditory Training and Reading, Visual Training and Reading, and Reading Only.                                                                                                                                                                        |
| Cox (1997)                      | US             | Reading             | Compares two reading comprehension instructions: Project Read and visualization and verbalization comprehension strategy.                                                                                                                                                       |
| Coyne et al. (2007)             | US             | Reading             | Compares two small-group vocabulary interventions: extended instruction and embedded instruction.                                                                                                                                                                               |
| Coyne et al. (2013a)            | US             | Reading             | Compares two ways of receiving the intervention, where one group receives systematic adjustments based on student performance while the other group receives no instructional modifications.                                                                                    |
| Coyne et al. (2013b)            | US             | Reading             | Compares Early Reading Intervention with a school-designed typical practice intervention.                                                                                                                                                                                       |
| Doss (2015)                     | US             | Reading             | Compares three conditions: one group receives a basic level of intervention, which is the lower level of decoding, the second group receives the skills level of intervention, which is the higher level of decoding. The control group receives a computer-based intervention. |
| Duerr (2008)                    | US             | Reading             | Both groups receive the Reading Recovery intervention where the classroom teachers of the treatment group receive weekly meetings with the Reading Recovery teachers, the teachers of the control group do not.                                                                 |
| Faggella-Luby & Wardwell (2011) | US             | Reading             | Compares three conditions: Story Structure (SS), Typical Practice delivered by reading specialists (TP), and Sustained Silent Reading (SSR).                                                                                                                                    |
| Fantuzzo et al. (1995)          | US             | Math                | Compares three conditions: Parent involvement + reciprocal peer tutoring, parent involvement, and practice control.                                                                                                                                                             |
| Fenty et al. (2015)             | US             | Reading             | Compares three conditions: a teacher-led group, a computer-assisted text-equivalent group, and a computer-assisted time-equivalent group.                                                                                                                                       |
| Fisher et al. (2007)            | Australia      | Reading             | Compares the effectiveness of two tutoring programs for children with persistent spelling difficulties: Look-Say-Cover-Write-Say-Check and Old Way/New Way - Mediation Learning.                                                                                                |
| Foorman et al. (1997)           | US             | Reading             | Compares three different reading interventions: synthetic phonics, analytic phonics, and sight-word                                                                                                                                                                             |
| Fryer et al. (2016)             | US             | Math, reading       | Compares vertical versus horizontal incentives in education.                                                                                                                                                                                                                    |

| <b>Authors</b>          | <b>Country</b> | <b>Test subject</b> | <b>Contrast</b>                                                                                                                                                                                                                                                     |
|-------------------------|----------------|---------------------|---------------------------------------------------------------------------------------------------------------------------------------------------------------------------------------------------------------------------------------------------------------------|
| Fuchs et al. (1985)     | US             | Reading             | Compares three goal ambitiousness groups: Low, moderately ambitious, and highly ambitious.                                                                                                                                                                          |
| Fuchs et al. (2006)     | US             | Math, reading       | Compares computer-assisted instruction in math and spelling.                                                                                                                                                                                                        |
| Fuchs et al. (2008)     | US             | Math                | Compares four conditions: Word recognition tutoring or 1 of 3 computation tutoring conditions: fact retrieval, procedural computation and computational estimation, and combined (fact retrieval + procedural computation and computational estimation).            |
| Gilbert et al. (2013)   | US             | Reading             | Compares different tiers in a multitiered supplemental tutoring program within a first-grade responsiveness-to-intervention prevention model. (One intervention-control contrast included in the meta-analysis).                                                    |
| Helf et al. (2009)      | US             | Reading             | Compares 1:1 tutoring lessons with 1:3 tutoring lessons.                                                                                                                                                                                                            |
| Hendricks et al. (2006) | US             | Math, reading       | Compares a patterning intervention with instruction in the academic subject matter, the teachers thought most useful.                                                                                                                                               |
| Hill (2009)             | US             | Math                | Compares students who have participated in synchronous and asynchronous online learning groups.                                                                                                                                                                     |
| Hogan-Gancarz (1999)    | US             | Math                | Compares a group receiving an individualized math program and memory strategy instruction to a group receiving only the individualized math program.                                                                                                                |
| Holmes (1985)           | US             | Reading             | Compares four small-group conditions delivered by the experimenter: Strategy plus materials, strategy only, materials only, and control. However, control group also practices certain questions and is anticipated to be affected; i.e., receives an intervention. |
| Hudson et al. (2011)    | US             | Reading             | Compares two small-group interventions: An accuracy condition and an accuracy + automaticity condition.                                                                                                                                                             |
| Hunt (2014)             | US             | Math                | Compares to conditions: Core instruction and core + intervention instruction.                                                                                                                                                                                       |
| Jessup (2017)           | US             | Reading             | Compares direct instruction and repeated reading for fluency.                                                                                                                                                                                                       |
| Jitendra et al. (2007)  | US             | Math                | Compares a single strategy (schema-based instruction) and a multiple strategy (general strategy instruction).                                                                                                                                                       |
| Jitendra et al. (2013a) | US             | Math                | Compares two small-group tutoring interventions: A school-provided standards-based curriculum (SBC) and a schema-based instruction (SBI) curriculum.                                                                                                                |
| Jitendra et al. (2013b) | US             | Math                | Compares two small-group tutoring interventions: A schema-based instruction (SBI) curriculum and a standard-based, school-provided curriculum. Extended focus on mathematical word problem solving in the SBI-group.                                                |
| Joiner (2012)           | US             | Reading             | Compares Reading Recovery intervention with Georgia's Early Intervention Program (Non-Reading Recovery EIP)                                                                                                                                                         |

| <b>Authors</b>            | <b>Country</b> | <b>Test subject</b> | <b>Contrast</b>                                                                                                                                                                          |
|---------------------------|----------------|---------------------|------------------------------------------------------------------------------------------------------------------------------------------------------------------------------------------|
| Kamps et al. (2007)       | US             | Reading             | Compares a direct instruction approach using "integrated curriculum", and a balanced literacy approach.                                                                                  |
| Kamps et al. (2008)       | US             | Reading             | Compares two small-group interventions: A direct instruction approach using "integrated curriculum", and a condition using either Open Court curriculum or Guided Reading.               |
| Kestel & Forgasz (2018)   | Australia      | Math                | Compares two modes of delivery: personal videoconferencing and face-to-face delivery.                                                                                                    |
| Kim et al. (2009)         | US             | Reading             | Compares the READ 180 intervention to a district after-school program in which teachers are able to select from 16 different enrichment activities.                                      |
| Lalley & Miller (2006)    | US             | Math                | Compares a pre-teaching condition with a re-teaching condition.                                                                                                                          |
| Lamminmäki et al. (1997)  | Chile          | Math, reading       | Compares Neurocognitive Treatment and Homework Assistance programs.                                                                                                                      |
| Leh & Jitendra (2012)     | US             | Math                | Compares computer-mediated instruction and teacher-mediated instruction.                                                                                                                 |
| Little et al. (2012)      | US             | Reading             | Compares Early Reading Intervention modified in response to student performance and a supplemental reading intervention (regrouping and curriculum pacing adjustments).                  |
| Lovett et al. (1990)      | Canada         | Reading             | Compares three interventions: Two word recognition and spelling training programs and a problem solving and study skills training program                                                |
| Lovett et al. (1994)      | Canada         | Reading             | Compares 2 forms of word identification training to promote transfer of learning by children with dyslexia and a study skills control program.                                           |
| Lovett & Steinbach (1997) | Canada         | Reading             | Compares two word identification training programs and a study skills program.                                                                                                           |
| Lovett et al. (2000)      | Canada         | Reading             | Compares the efficacy of a combination of phonological and strategy-based remedial approaches for reading disability (RD) to that of each approach separately.                           |
| Lovett et al. (2008)      | Canada         | Reading             | Compares three reading interventions and a special education reading control program.                                                                                                    |
| Lysynchuk et al. (1990)   | Canada         | Reading             | Compares reading-strategy instruction and reading practice. Control subjects were exposed to the same materials as reciprocally trained students but were given no strategy instruction. |
| Mathes et al. (2005)      | US             | Reading             | Compares two small-group interventions: Proactive Reading and Responsive Reading. The intervention groups and control group all receive enhanced classroom instruction.                  |
| McArthur et al. (2015)    | Australia      | Reading             | Compares sight word training and phonics training in children with dyslexia. Three different intervention groups receive the training in different orders.                               |

| <b>Authors</b>               | <b>Country</b> | <b>Test subject</b> | <b>Contrast</b>                                                                                                                                                                                            |
|------------------------------|----------------|---------------------|------------------------------------------------------------------------------------------------------------------------------------------------------------------------------------------------------------|
| McDermott & Stegemann (1987) | US             | Math                | Compares three instructional methods: Computer-assisted instruction (CAI) with a reward game, computer-assisted instruction without a reward game, and paper-and-pencil.                                   |
| McMaster et al. (2005)       | US             | Reading             | For students not responding sufficiently to PALS, three individualized treatments are compared: PALS, Modified PALS, or tutoring by an adult.                                                              |
| Miller (2009)                | US             | Reading             | Compares two instructional approaches: A basal student-directed approach and an explicit teacher-directed approach.                                                                                        |
| Morris et al. (2012)         | US, Canada     | Reading             | Compares the effectiveness of two multiple-component intervention programs for children with reading disabilities (PHAB + RAVE-O; PHAB + WIST) to alternate (CSS, MATH) and phonological control programs. |
| Morse-Taylor (2010)          | US             | Reading             | Compares four EIP grouping models: Augmented, self-contained, reduced, and regular.                                                                                                                        |
| Nash & Snowling (2006)       | UK             | Reading             | Compares the effects of two different methods of teaching vocabulary on vocabulary knowledge and reading comprehension.                                                                                    |
| O'Connor et al. (2005)       | US             | Reading             | Multi-layered intervention, the first layer being professional development. The second layer is direct intervention through small-group instruction.                                                       |
| O'Connor et al. (2014a)      | US             | Math, reading       | Compares the effects of INSIGHTS and a supplemental reading program in increasing academic achievement, sustaining attention and reducing disruptive behavior problems.                                    |
| O'Connor et al. (2014b)      | US             | Math, reading       | Compares the effects of INSIGHTS and a supplemental after-school reading program in enhancing the academic development of shy children.                                                                    |
| Olympia et al. (1994)        | US             | Math                | Examined effectiveness of self-managed individual and group contingency procedures in improving completion and accuracy rates of daily mathematics homework assignments.                                   |
| Oudeans (2003)               | US             | Reading             | Compares two sequences for integrating and teaching letter-sound correspondences and phonological blending and segmenting.                                                                                 |
| Parrila et al. (1999)        | Canada         | Reading             | Compares the PASS Reading Enhancement Program and Meaning-Based Reading intervention.                                                                                                                      |
| Pascarella et al. (1983)     | US             | Reading             | Compares two reading instruction programs on context cue use differing only in extent of student control over determination of errors.                                                                     |
| Pasnak et al. (2015)         | US             | Math, reading       | Compares four conditions of small-group instruction: In sequences, reading, mathematics, and social studies.                                                                                               |
| Pavchinski (1988)            | US             | Math                | Compares operant procedures, cognitive behavior modification and a condition consisting of direct instruction of math skills.                                                                              |
| Pflaum et al. (1982)         | US             | Reading             | Compares four comprehension-facilitating conditions (word identification and meaning aids, sentence aids, purpose-setting aids, and prior-knowledge aids).                                                 |

| Authors                | Country     | Test subject | Contrast                                                                                                                                                                                                                                                                                                                                                                                        |
|------------------------|-------------|--------------|-------------------------------------------------------------------------------------------------------------------------------------------------------------------------------------------------------------------------------------------------------------------------------------------------------------------------------------------------------------------------------------------------|
| Pinnell (1988)         | US          | Reading      | Compares Reading Recovery, an instructional approach which deliberately links reading and writing, to an alternative compensatory program which focuses on skills and isolated information.                                                                                                                                                                                                     |
| Pinnell et al. (1988)  | US          | Reading      | Compares Reading Recovery to an alternative compensatory program.                                                                                                                                                                                                                                                                                                                               |
| Reutzel et al. (2012)  | US          | Reading      | Both groups follow the state-approved Comprehensive Core Reading Program (CCRP) and receive an additional 30 min of supplemental reading instruction every day. The experimental group receives the guided, silent reading intervention, <i>Reading Plus</i> , and the control group receives <i>Soar to Success, Essential Elements of Reading: Vocabulary, Voyager Passport or Earobics</i> . |
| Ritchey et al. (2012)  | US          | Reading      | Compares a multicomponent supplemental intervention targeting fluency and expository comprehension of science texts to a group that receives progress monitoring.                                                                                                                                                                                                                               |
| Ruggiero (2004)        | US          | Reading      | Partial inclusion support services as compared to support service instruction provided on a pull-out or self-contained classroom basis.                                                                                                                                                                                                                                                         |
| Russel & Ford (1983)   | US          | Reading      | Compares a group of students working on a one-to-one basis with tutors and a group working in a small group with a teacher.                                                                                                                                                                                                                                                                     |
| Rzoska & Ward (1991)   | New Zealand | Math         | Compares cooperative and competitive group-learning.                                                                                                                                                                                                                                                                                                                                            |
| Saine et al. (2011)    | Finland     | Reading      | Compares two conditions for at-risk readers: regular remedial reading intervention, computer-assessed reading intervention.                                                                                                                                                                                                                                                                     |
| Saine et al. (2013)    | Finland     | Reading      | Compares two conditions at-risk readers: a regular remedial reading intervention, a computer-assisted remedial reading intervention.                                                                                                                                                                                                                                                            |
| Santoro et al. (2006)  | US          | Reading      | Compares three conditions: two experimental conditions that focus on increasing beginning reading skills and one comparison group that receive commercial reading program's sounds and letters module.                                                                                                                                                                                          |
| Schwartz et al. (2012) | US          | Reading      | Compares the effect of group sizes, teaching Reading Recovery in a 1:1 and a small-group instructional format with teacher-student ratios of 1:2, 1:3, or 1:5.                                                                                                                                                                                                                                  |
| Simmons et al. (2007)  | US          | Reading      | Compares three conditions: (a) 30 min with high design specificity (30/H), (b) 15 min with high design specificity plus 15 min of non-code-based instruction (15/H+15), and (c) a commercial comparison condition that reflected 30 min of moderate design specificity instruction (30/M).                                                                                                      |
| Simmons et al. (2011)  | US          | Reading      | Compares the effects of 2 supplemental reading interventions: An explicit/systematic commercial program and a school-designed practice intervention.                                                                                                                                                                                                                                            |
| Simmons et al. (2015)  | US          | Reading      | Compares students from four randomized control trials, and divide them into two groups: Students who received ERI with ongoing adjustments (ERI-A) and students who received ERI implemented conventionally (ERI-matched peers).                                                                                                                                                                |

| <b>Authors</b>                 | <b>Country</b> | <b>Test subject</b> | <b>Contrast</b>                                                                                                                                                                                 |
|--------------------------------|----------------|---------------------|-------------------------------------------------------------------------------------------------------------------------------------------------------------------------------------------------|
| Slavin et al. (2011)           | US             | Reading             | Compares the effect of transitional bilingual education (TBE) and structured English immersion (SEI) on the language and reading performance of Spanish-dominant children.                      |
| Smith-Davis (2007)             | US             | Reading             | Compares the effect of the Success for All reading program to other evidenced-based reading programs.                                                                                           |
| Soltero-González et al. (2016) | US             | Reading             | Compares the biliteracy outcomes for students in a paired literacy model to those of students in a sequential literacy model                                                                    |
| Spies et al. (2018)            | US             | Reading             | Students receive a transitional bilingual education (TBE) or a TBE-enhanced program to gains English language and literacy skills.                                                              |
| Tong et al. (2008a)            | US             | Reading             | Students receiving a structured developmental bilingual education program are compared with students receiving typical-practice model of late-exit transitional bilingual education program.    |
| Tong et al. (2008b)            | US             | Reading             | Compares ELLs students receiving an enhanced Transitional bilingual education (TBE) and structured English immersion (SEI) program and ELLs students receiving typical-practice of TBE and SEI. |
| Torgerson et al. (2011)        | UK             | Math                | Compares 1:1 tutoring with 1:2 and 1:3 tutoring.                                                                                                                                                |
| Torgesen et al. (2001)         | US             | Reading             | Compares Auditory Discrimination in Depth Program to Embedded Phonics.                                                                                                                          |
| Torgesen et al. (2003)         | US             | Reading             | Compares two computer supported approaches: Auditory Discrimination in Depth and Read, Write, and Type.                                                                                         |
| Tremblay (2013)                | Belgium        | Math, reading       | Compares co-teaching inclusion and solo-taught special education.                                                                                                                               |
| Vaughn et al. (2003)           | US             | Reading             | Compares the effects of three grouping formats: 1:1, 1:3, and 1:10.                                                                                                                             |
| Wade & Kass (1986)             | US             | Reading             | Compares remediation of hypothesized component deficits given prior to remediation of known academic deficiencies to remediation of known academic deficiencies alone.                          |
| Wages (2013)                   | US             | Reading             | Compares the content-based English as a second language program to the late exit transitional bilingual program.                                                                                |
| Wang et al. (2016)             | US             | Reading             | Compares academic effects of Language! Live with Corrective Reading, Soar to Success, and Wilson reading intervention programs.                                                                 |
| Wanzek & Vaughn (2008)         | US             | Reading             | Compares three conditions: (a) a single dose of intervention, (b) a double dose of intervention, or (c) a school intervention.                                                                  |
| Wesson (1983)                  | US             | Reading             | Compares two student self-management techniques: student charting and student selection of instructional activities.                                                                            |
| Wilson & Kaplan (1994)         | Canada         | Reading             | Compares gained reading skills of two treatment groups receiving individual sessions of sensory integration (therapy) or individual tutoring.                                                   |

| <b>Authors</b>     | <b>Country</b> | <b>Test subject</b> | <b>Contrast</b>                                                                                                                                   |
|--------------------|----------------|---------------------|---------------------------------------------------------------------------------------------------------------------------------------------------|
| Wise (2005)        | US             | Reading             | Compares four conditions: PHAB/DI + CSS program, PHAB/DI + WIST, PHAB/DI + RAVE-O, and comparison group (math instruction program + CSS program). |
| Wise et al. (1997) | US             | Reading             | Compares phonological training with an articulatory component with phonological awareness training without a specific speech-motor component.     |
| Woodward (2006)    | US             | Math                | Compares an integrated approach (strategies and timed practice drills) with timed practice drills only for teaching multiplication facts.         |
| Xin (1999)         | US             | Math                | Compares cooperative learning to whole-class learning supported by computer technology.                                                           |
| Xin et al. (2011)  | US             | Math                | Compares a conceptual model-based problem-solving approach to a general heuristic instructional approach.                                         |
