# Supplementary material for: Targeted school‐based interventions for improving reading and mathematics for students with or at risk of academic difficulties in Grades K‐6: A systematic review
Source: PubMed Central journal article supplement (PMC8356298; doi:10.1002/cl2.1152), 2021-04-06
Supplement: CL2-17-e1152-s002.pdf [file CL2-17-e1152-s002.pdf]

---

## Online Appendix C: Studies with overlapping samples and lacking information

---

Table A1 lists the studies that we did not include in the meta-analysis because we could not obtain enough information to calculate an effect size, or because they used samples that overlapped with other included studies. The table also contains information about the studies with which the latter had overlapping samples. Some of these studies were included in the meta-analysis, and some were comparison designs not included in the meta-analysis.

*Table A1. Studies with overlapping samples*

| <b>Authors</b>               | <b>Country</b> | <b>Test subject</b> | <b>Reason for not being included in meta-analysis</b>             |
|------------------------------|----------------|---------------------|-------------------------------------------------------------------|
| Baker et al. (2015)          | US             | Reading             | Overlapping with Smith et al. (2016).                             |
| Chaparro et al. (2012)       | US             | Reading             | Overlapping with Smith et al. (2016).                             |
| Fien et al. (2015)           | US             | Reading             | Overlapping with Smith et al. (2016).                             |
| Fives (2016)                 | Ireland        | Reading             | Overlapping with Fives et al. (2013).                             |
| Foster (2014)                | US             | Math                | Overlapping samples with Morris et al. (2007).                    |
| Fuchs et al. (2002)          | US             | Reading             | Overlapping with Fuchs et al. (2001).                             |
| Fuchs et al. (2015)          | US             | Math                | Overlapping samples with Fuchs et al. (2013, 2014b).              |
| Gunn et al. (2000)           | US             | Reading             | Overlapping samples with Gunn et al. (2005).                      |
| Gunn et al. (2002)           | US             | Reading             | Overlapping samples with Gunn et al. (2005).                      |
| Hagan-Burke et al. (2013)    | US             | Reading             | Overlapping with Simmons et al. (2011).                           |
| Kamps & Greenwood (2005)     | US             | Reading             | Overlapping with Kamps et al. (2008).                             |
| Linan-Thompson et al. (2006) | US             | Reading             | Overlapping with Vaughn et al. (2006b) and Vaughn et al. (2006c). |
| Linan-Thompson et al. (2007) | US             | Reading             | Overlapping with Vaughn et al. (2006a).                           |
| Powell et al. (2015)         | US             | Math                | Overlapping with Fuchs et al. (2014).                             |
| Sáenz et al. (2005)          | US             | Reading             | Overlapping with Sáenz (2002).                                    |
| Tong et al. (2011)           | US             | Reading             | Overlapping with Tong et al. (2008) and Tong et al. (2011).       |
| Wanzek et al. (2011)         | US             | Reading             | Overlapping with Vaughn et al. (2010).                            |
| Babinski et al. (2018)       | US             | Reading             | Lack information to calculate an effect size.                     |
| Baenen et al. (1997)         | US             | Reading             | Lack information to calculate an effect size.                     |
| Boardman et al. (2016)       | US             | Reading             | Lack information to calculate an effect size.                     |
| Bramlett (1992)              | US             | Reading             | Lack information to calculate an effect size.                     |
| Carlo et al. (2004)          | US             | Reading             | Lack information to calculate an effect size.                     |
| Carter & Russel (1985)       | US             | Reading             | Lack information to calculate an effect size.                     |

| <b>Authors</b>                         | <b>Country</b> | <b>Test subject</b> | <b>Reason for not being included in meta-analysis</b> |
|----------------------------------------|----------------|---------------------|-------------------------------------------------------|
| Chiang (2007)                          | US             | Math, reading       | Lack information to calculate an effect size.         |
| Chin et al. (2012)                     | US             | Reading             | Lack information to calculate an effect size.         |
| Chodkiewicz & Boyle (2016)             | Australia      | Math, reading       | Lack information to calculate an effect size.         |
| Cobb (2001)                            | US             | Reading             | Lack information to calculate an effect size.         |
| Glassman (1988)                        | US             | Math, reading       | Lack information to calculate an effect size.         |
| Gottshall (2007)                       | US             | Reading             | Lack information to calculate an effect size.         |
| Greenwood (1991)                       | US             | Math, reading       | Lack information to calculate an effect size.         |
| Hummel & Hahn (1982)                   | US             | Math                | Lack information to calculate an effect size.         |
| Mackey et al. (2017)                   | US             | Math                | Lack information to calculate an effect size.         |
| Miller & Connolly (2013)               | UK             | Reading             | Lack information to calculate an effect size.         |
| Peña (2008)                            | US             | Reading             | Lack information to calculate an effect size.         |
| Scientific Learning Corporation (2006) | US             | Reading             | Lack information to calculate an effect size.         |
| Stavros (1989)                         | US             | Math, reading       | Lack information to calculate an effect size.         |
| Taub et al. (2007)                     | US             | Reading             | Lack information to calculate an effect size.         |
| Taub et al. (2015)                     | US             | Math                | Lack information to calculate an effect size.         |
| Woods (1986)                           | Australia      | Math, reading       | Lack information to calculate an effect size.         |
| Ysseldyke et al. (2003)                | US             | Math                | Lack information to calculate an effect size.         |
| Zunker (2008)                          | US             | Math                | Lack information to calculate an effect size.         |
