# Supplementary material for: Targeted school‐based interventions for improving reading and mathematics for students with or at risk of academic difficulties in Grades K‐6: A systematic review
Source: PubMed Central journal article supplement (PMC8356298; doi:10.1002/cl2.1152), 2021-04-06
Supplement: CL2-17-e1152-s007.pdf [file CL2-17-e1152-s007.pdf]

---

## Online Appendix A: Search strategy by database

---

The following figure shows the search results for each bibliographic database searched in the original 2016 search and the 2018 update.

| Database                                   | Results in March 2016 | Results in July 2018  |
|--------------------------------------------|-----------------------|-----------------------|
| Academic Search Premier (EBSCO-host)       | 1,548                 | 759                   |
| ERIC (EBSCO-host)                          | 5,862                 | 422                   |
| PsycINFO (EBSCO-host)                      | 5,505                 | 1,065                 |
| SocIndex (EBSCO-host)                      | 328                   | 91                    |
| British Education Index (EBSCO-host)       | 96                    | No access in 2018     |
| Teacher Reference Center (EBSCO-host)      | 643                   | 188                   |
| ECONLIT (EBSCO-host)                       | 58                    | 16                    |
| FRANCIS (EBSCO-host)                       | 165                   | No access in 2018     |
| Dissertation & theses A&I (ProQuest-host)  | 786                   | No access in 2018     |
| CBCA Education (ProQuest-host)             | 97                    | No access in 2018     |
| Australian Education Index (ProQuest-host) | 85                    | No access in 2018     |
| Social Science Citation Index (WOS)        | 2,376                 | 907                   |
| Science Citation Index (WOS)               | Searched with SSCI    | Searched with SSCI    |
| Medline (OVID-host)                        | 323                   | 0                     |
| Embase (OVID-host)                         | Searched with Medline | Searched with Medline |

### Search strings for electronic databases

The individual search strings used to search the electronic databases are reported below. Most of the reported search strings are from the 2018 update. The search strings used in the update were identical to the original search strings from the 2016 search.

As mentioned in the deviations from protocol section in the review, the accessibility of some of the electronic databases changed in the period between the original and the updated search. For the searches that were not updated in 2018, or had no new results, we have reported the original search string from 2016.

### Academic Search Premier

Searched through EBSCO-host interface. Search performed 2018/25/06. Search modes - Boolean/Phrase. Limiters - Date Published: 2016/01/03 - 2018/25/06.

| Search | Search Terms                                                                                                                                                                                                                                                                                                           | Results |
|--------|------------------------------------------------------------------------------------------------------------------------------------------------------------------------------------------------------------------------------------------------------------------------------------------------------------------------|---------|
| S42    | S20 AND S41                                                                                                                                                                                                                                                                                                            | 759     |
| S41    | S21 OR S22 OR S23 OR S24 OR S25 OR S26 OR S27 OR S28 OR S29 OR S30 OR S31 OR S32 OR S33 OR S34 OR S35 OR S36 OR S37 OR S38 OR S39 OR S40                                                                                                                                                                               | 617,127 |
| S40    | TI (regression N1 discontinuity OR difference-in-difference* OR event N1 stud* OR interrupted time serie* OR instrumental variable* OR waitlist control*) OR AB (regression N1 discontinuity OR difference-in-difference* OR event N1 stud* OR interrupted time serie* OR instrumental variable* OR waitlist control*) | 13,232  |

|     |                                                                                                                                                                                                                                                                                                                                                                                                                                                                                                                                                                                                                                                                                                                                                                                                                                                    |           |
|-----|----------------------------------------------------------------------------------------------------------------------------------------------------------------------------------------------------------------------------------------------------------------------------------------------------------------------------------------------------------------------------------------------------------------------------------------------------------------------------------------------------------------------------------------------------------------------------------------------------------------------------------------------------------------------------------------------------------------------------------------------------------------------------------------------------------------------------------------------------|-----------|
| S39 | TI ((control N5 case) OR (control N5 subject*) OR (control N5 group*) OR (control N5 patient*) OR (control N5 intervention) ) OR AB ( (control N5 case) OR (control N5 subject*) OR (control N5 group*) OR (control N5 patient*) OR (control N5 intervention))                                                                                                                                                                                                                                                                                                                                                                                                                                                                                                                                                                                     | 406,468   |
| S38 | TI ((treatment N5 case) OR (treatment N5 subject*) OR (treatment N5 group*) OR (treatment N5 patient*) OR (treatment N5 intervention) ) OR AB ( (treatment N5 case) OR (treatment N5 subject*) OR (treatment N5 group*) OR (treatment N5 patient*) OR (treatment N5 intervention))                                                                                                                                                                                                                                                                                                                                                                                                                                                                                                                                                                 | 364,183   |
| S37 | TI ((experiment* N5 case) OR (experiment* N5 subject*) OR (experiment* N5 group*) OR (experiment* N5 patient*) OR (experiment* N5 intervention)) OR AB ( (experiment* N5 case) OR (experiment* N5 subject*) OR (experiment* N5 group*) OR (experiment* N5 patient*) OR (experiment* N5 intervention))                                                                                                                                                                                                                                                                                                                                                                                                                                                                                                                                              | 77,447    |
| S36 | ((assign* N5 case) OR (assign* N5 subject*) OR (assign* N5 group*) OR (assign* N5 patient*) OR (assign* N5 intervention) ) OR AB ( (assign* N5 case) OR (assign* N5 subject*) OR (assign* N5 group*) OR (assign* N5 patient*) OR (assign* N5 intervention) )                                                                                                                                                                                                                                                                                                                                                                                                                                                                                                                                                                                       | 47,070    |
| S35 | TI ((intervention N5 case) OR (intervention N5 subject*) OR (intervention N5 group*) OR (intervention N5 patient*) ) OR AB ( (intervention N5 case) OR (intervention N5 subject*) OR (intervention N5 group*) OR (intervention N5 patient*) )                                                                                                                                                                                                                                                                                                                                                                                                                                                                                                                                                                                                      | 80,066    |
| S34 | TI (quasi-experiment* OR quasiexperiment* OR Propensity score* OR (compar* N1 group*) OR (match* N1 control*) OR (match* N1 group*) OR (match* N1 compar*) OR experiment* trial* OR experiment* design* OR experiment* method* OR experiment* stud* OR experiment* evaluation* OR experiment* test* OR experiment* assessment* OR assessment only OR (comparison N1 samp*) OR propensity match* OR (Between N1 group*)) OR AB ( quasi-experiment* OR quasiexperiment* OR Propensity score* OR (compar* N1 group*) OR (match* N1 control*) OR (match* N1 group*) OR (match* N1 compar*) OR experiment* trial* OR experiment* design* OR experiment* method* OR experiment* stud* OR experiment* evaluation* OR experiment* test* OR experiment*assessment* OR assessment only OR (comparison N1 samp*) OR propensity match* OR (Between N1 group*)) | 671,758   |
| S33 | TI ((random* N2 trial*) OR RCT) OR AB ((random* N2 trial*) OR RCT)                                                                                                                                                                                                                                                                                                                                                                                                                                                                                                                                                                                                                                                                                                                                                                                 | 146,516   |
| S32 | TI Non-random* OR nonradom* OR (non N1 random*) OR AB Non-random* OR Nonrandom* OR (non N1 random*)                                                                                                                                                                                                                                                                                                                                                                                                                                                                                                                                                                                                                                                                                                                                                | 19,686    |
| S31 | TI ((Propensity score* OR (match* N1 control*) OR (match* N1 compar* ) OR assessment only OR comparison samp* OR propensity match*)) OR AB ((Propensity score* OR (match* N1 control*) OR (match* N1 compar* ) OR assessment only OR comparison samp* OR propensity match*))                                                                                                                                                                                                                                                                                                                                                                                                                                                                                                                                                                       | 75,636    |
| S30 | TI assign* N3 (subject* OR patient* ) OR AB assign* N3 (subject* OR patient* )                                                                                                                                                                                                                                                                                                                                                                                                                                                                                                                                                                                                                                                                                                                                                                     | 15,465    |
| S29 | TI (quasi-experiment* OR quasiexperiment* OR experiment*) OR AB (quasi-experiment* OR quasiexperiment* OR experiment*)                                                                                                                                                                                                                                                                                                                                                                                                                                                                                                                                                                                                                                                                                                                             | 1,897,100 |
| S28 | TI Intervention* N1 Stud* OR AB Intervention* N1 Stud*                                                                                                                                                                                                                                                                                                                                                                                                                                                                                                                                                                                                                                                                                                                                                                                             | 20,333    |
| S27 | TI ((prospective N2 study) OR AB (prospective N2 study)) OR (TI retrospective OR AB retrospective)                                                                                                                                                                                                                                                                                                                                                                                                                                                                                                                                                                                                                                                                                                                                                 | 299,219   |
| S26 | TI longitudinal OR AB longitudinal OR TI observational OR AB observational                                                                                                                                                                                                                                                                                                                                                                                                                                                                                                                                                                                                                                                                                                                                                                         | 241,040   |
| S25 | TI (epidemiologic N2 study) OR AB (epidemiologic N2 study) OR TI (follow up OR followup) N2 study OR AB (follow up OR followup) N2 study)                                                                                                                                                                                                                                                                                                                                                                                                                                                                                                                                                                                                                                                                                                          | 33,112    |
| S24 | TI cross sectional OR AB cross sectional                                                                                                                                                                                                                                                                                                                                                                                                                                                                                                                                                                                                                                                                                                                                                                                                           | 162,455   |
| S23 | TI ((case control) OR AB (case control)) OR TI cohort OR AB cohort                                                                                                                                                                                                                                                                                                                                                                                                                                                                                                                                                                                                                                                                                                                                                                                 | 296,927   |
| S22 | DE "Cohort analysis" OR DE "Case Study"                                                                                                                                                                                                                                                                                                                                                                                                                                                                                                                                                                                                                                                                                                                                                                                                            | 31,611    |
| S21 | AB randomized OR AB placebo OR AB randomly OR trial OR AB groups                                                                                                                                                                                                                                                                                                                                                                                                                                                                                                                                                                                                                                                                                                                                                                                   | 2,813,093 |
| S20 | S5 AND S12 AND S19                                                                                                                                                                                                                                                                                                                                                                                                                                                                                                                                                                                                                                                                                                                                                                                                                                 | 1,842     |
| S19 | S6 OR S7 OR S8 OR S9 OR S10 OR S11 OR S12 OR S13 OR S14 OR S15 OR S16 OR S17 OR S18                                                                                                                                                                                                                                                                                                                                                                                                                                                                                                                                                                                                                                                                                                                                                                | 227,565   |

|     |                                                                                                                                                                                                                                                                                                                 |           |
|-----|-----------------------------------------------------------------------------------------------------------------------------------------------------------------------------------------------------------------------------------------------------------------------------------------------------------------|-----------|
| S18 | transfer* N2 effect                                                                                                                                                                                                                                                                                             | 7,211     |
| S17 | Writ*                                                                                                                                                                                                                                                                                                           | 782,474   |
| S16 | Numeracy OR Mathematic* OR Math                                                                                                                                                                                                                                                                                 | 1,330,548 |
| S15 | DE "Mathematics" OR DE "Numeracy"                                                                                                                                                                                                                                                                               | 71,599    |
| S14 | Reading OR Literacy                                                                                                                                                                                                                                                                                             | 308,484   |
| S13 | DE "Reading" OR DE "Literacy"                                                                                                                                                                                                                                                                                   | 33,263    |
| S12 | S6 OR S7 OR S8 OR S9 OR S10 OR S11                                                                                                                                                                                                                                                                              | 9,299     |
| S11 | Intellect* N2 develop*                                                                                                                                                                                                                                                                                          | 11,571    |
| S10 | DE "Intellectual Development"                                                                                                                                                                                                                                                                                   | 1,435     |
| S9  | School N1 (performan* OR achiev*)                                                                                                                                                                                                                                                                               | 35,657    |
| S8  | Academic* N2 (performance* OR achiev* OR abilit* OR outcome*)                                                                                                                                                                                                                                                   | 47,766    |
| S7  | Learn* N2 (disab* OR Problem*)                                                                                                                                                                                                                                                                                  | 37,567    |
| S6  | DE "Academic Achievement" OR DE "Academic Ability" OR DE "Learning Problems" OR (DE "Learning Disabilities")                                                                                                                                                                                                    | 40,235    |
| S5  | S1 OR S2 OR S3 OR S4                                                                                                                                                                                                                                                                                            | 19,437    |
| S4  | (Student* OR pupil*) N3 (Learn* N2 (disab* OR Problem*))                                                                                                                                                                                                                                                        | 3,838     |
| S3  | (Child* N2 (placed N1 care)) OR ((DE "Foster Care") AND child*)                                                                                                                                                                                                                                                 | 1,380     |
| S2  | ((Primary N1 School ) N3 (Student* OR pupil*)) OR ((Elementary N1 School) N3 (Student* OR pupil*)) OR (DE "Elementary School Students") OR ((Secondary N1 school) OR ( high N2 school) OR (middle N1 School) N3 (student* OR pupil*))                                                                           | 265,175   |
| S1  | (Underachiev* OR Under N1 achiev* OR lowachiev* OR low N1 achiev* OR Low N1 perform* OR lowerperform* OR (at-risk OR at N1 risk)) N1 (student* OR pupil*) OR ((high-risk OR high N1 risk) N1 (student* OR pupil*)) OR ((Special N1 Need*) N1 (Student* OR pupil*)) OR ((Low N1 income) N1 (student* OR pupil*)) | 12,388    |

## ERIC (Education Resources Information Center)

Searched through EBSCO-host interface. Search performed 2018/25/06. Search modes - Boolean/Phrase. Limiters - Date Published: 2016/01/03 - 2018/25/06.

| Search | Search Terms                                                                                                                                                                                                                                                                                                           | Results |
|--------|------------------------------------------------------------------------------------------------------------------------------------------------------------------------------------------------------------------------------------------------------------------------------------------------------------------------|---------|
| S63    | S41 AND S62                                                                                                                                                                                                                                                                                                            | 422     |
| S62    | S42 OR S43 OR S44 OR S45 OR S46 OR S47 OR S48 OR S49 OR S50 OR S51 OR S52 OR S53 OR S54 OR S55 OR S56 OR S57 OR S58 OR S59 OR S60 OR S61                                                                                                                                                                               | 17,316  |
| S61    | TI (regression N1 discontinuity OR difference-in-difference* OR event N1 stud* OR interrupted time serie* OR instrumental variable* OR waitlist control*) OR AB (regression N1 discontinuity OR difference-in-difference* OR event N1 stud* OR interrupted time serie* OR instrumental variable* OR waitlist control*) | 2,059   |
| S60    | TI ((control N5 case) OR (control N5 subject*) OR (control N5 group*) OR (control N5 patient*) OR (control N5 intervention) ) OR AB ( (control N5 case) OR (control N5 subject*) OR (control N5 group*) OR (control N5 patient*) OR (control N5 intervention))                                                         | 22,676  |

|     |                                                                                                                                                                                                                                                                                                                                                                                                                                                                                                                                                                                                                                                                                                                                                                                                                                                     |         |
|-----|-----------------------------------------------------------------------------------------------------------------------------------------------------------------------------------------------------------------------------------------------------------------------------------------------------------------------------------------------------------------------------------------------------------------------------------------------------------------------------------------------------------------------------------------------------------------------------------------------------------------------------------------------------------------------------------------------------------------------------------------------------------------------------------------------------------------------------------------------------|---------|
| S59 | TI ((treatment N5 case) OR (treatment N5 subject*) OR (treatment N5 group*) OR (treatment N5 patient*) OR (treatment N5 intervention)) OR AB ((treatment N5 case) OR (treatment N5 subject*) OR (treatment N5 group*) OR (treatment N5 patient*) OR (treatment N5 intervention))                                                                                                                                                                                                                                                                                                                                                                                                                                                                                                                                                                    | 10,313  |
| S58 | TI ((experiment* N5 case) OR (experiment* N5 subject*) OR (experiment* N5 group*) OR (experiment* N5 patient*) OR (experiment* N5 intervention)) OR AB ((experiment* N5 case) OR (experiment* N5 subject*) OR (experiment* N5 group*) OR (experiment* N5 patient*) OR (experiment* N5 intervention))                                                                                                                                                                                                                                                                                                                                                                                                                                                                                                                                                | 14,860  |
| S57 | TI ((intervention N5 case) OR (intervention N5 subject*) OR (intervention N5 group*) OR (intervention N5 patient*)) OR AB ((intervention N5 case) OR (intervention N5 subject*) OR (intervention N5 group*) OR (intervention N5 patient*))                                                                                                                                                                                                                                                                                                                                                                                                                                                                                                                                                                                                          | 6,016   |
| S56 | ((assign* N5 case) OR (assign* N5 subject*) OR (assign* N5 group*) OR (assign* N5 patient*) OR (assign* N5 intervention) ) OR AB ( (assign* N5 case) OR (assign* N5 subject*) OR (assign* N5 group*) OR (assign* N5 patient*) OR (assign* N5 intervention) )                                                                                                                                                                                                                                                                                                                                                                                                                                                                                                                                                                                        | 7,399   |
| S55 | TI ( quasi-experiment* OR quasiexperiment* OR Propensity score* OR (compar* N1 group*) OR (match* N1 control*) OR (match* N1 group*) OR (match* N1 compar*) OR experiment* trial* OR experiment* design* OR experiment* method* OR experiment* stud* OR experiment* evaluation* OR experiment* test* OR experiment* assessment* OR assessment only OR (comparison N1 samp*) OR propensity match* OR (Between N1 group*)) OR AB ( quasi-experiment* OR quasiexperiment* OR Propensity score* OR (compar* N1 group*) OR (match* N1 control*) OR (match* N1 group*) OR (match* N1 compar*) OR experiment* trial* OR experiment* design* OR experiment* method* OR experiment* stud* OR experiment* evaluation* OR experiment* test* OR experiment*assessment* OR assessment only OR (comparison N1 samp*) OR propensity match* OR (Between N1 group*)) | 47,587  |
| S54 | TI ((random* N2 trial*) OR RCT) OR AB ((random* N2 trial*) OR RCT)                                                                                                                                                                                                                                                                                                                                                                                                                                                                                                                                                                                                                                                                                                                                                                                  | 3,287   |
| S53 | TI Non-random* OR nonradom* OR (non N1 random*) OR AB Non-random* OR Nonrandom* OR (non N1 random*)                                                                                                                                                                                                                                                                                                                                                                                                                                                                                                                                                                                                                                                                                                                                                 | 704     |
| S52 | TI ((Propensity score* OR (match* N1 control*) OR (match* N1 compar*) OR assessment only OR comparison samp* OR propensity match*)) OR AB ((Propensity score* OR (match* N1 control*) OR (match* N1 compar*) OR assessment only OR comparison samp* OR propensity match*))                                                                                                                                                                                                                                                                                                                                                                                                                                                                                                                                                                          | 4,737   |
| S51 | TI assign* N3 (subject* OR patient* ) OR AB assign* N3 (subject* OR patient* )                                                                                                                                                                                                                                                                                                                                                                                                                                                                                                                                                                                                                                                                                                                                                                      | 1,066   |
| S50 | TI (quasi-experiment* OR quasiexperiment* OR experiment*) OR AB (quasi-experiment* OR quasiexperiment* OR experiment*)                                                                                                                                                                                                                                                                                                                                                                                                                                                                                                                                                                                                                                                                                                                              | 78,215  |
| S49 | TI Intervention* N1 Stud* OR AB Intervention* N1 Stud*                                                                                                                                                                                                                                                                                                                                                                                                                                                                                                                                                                                                                                                                                                                                                                                              | 3,913   |
| S48 | TI ((prospective n2 study) OR AB (prospective n2 study)) OR (TI retrospective OR AB retrospective)                                                                                                                                                                                                                                                                                                                                                                                                                                                                                                                                                                                                                                                                                                                                                  | 4,749   |
| S47 | TI longitudinal OR AB longitudinal OR TI observational OR AB observational                                                                                                                                                                                                                                                                                                                                                                                                                                                                                                                                                                                                                                                                                                                                                                          | 29,654  |
| S46 | TI (epidemiologic N2 study) OR AB (epidemiologic N2 study) OR TI (follow up OR followup) N2 study OR AB (follow up OR followup) N2 study                                                                                                                                                                                                                                                                                                                                                                                                                                                                                                                                                                                                                                                                                                            | 4,513   |
| S45 | TI cross sectional OR AB cross sectional                                                                                                                                                                                                                                                                                                                                                                                                                                                                                                                                                                                                                                                                                                                                                                                                            | 4,989   |
| S44 | TI ((case control) OR AB (case control)) OR TI cohort OR AB cohort                                                                                                                                                                                                                                                                                                                                                                                                                                                                                                                                                                                                                                                                                                                                                                                  | 11,928  |
| S43 | DE "Cohort analysis" OR DE "Case Studies"                                                                                                                                                                                                                                                                                                                                                                                                                                                                                                                                                                                                                                                                                                                                                                                                           | 60,360  |
| S42 | AB randomized OR AB placebo OR AB randomly OR trial OR AB groups                                                                                                                                                                                                                                                                                                                                                                                                                                                                                                                                                                                                                                                                                                                                                                                    | 244,168 |
| S41 | S26 AND S33 AND S40                                                                                                                                                                                                                                                                                                                                                                                                                                                                                                                                                                                                                                                                                                                                                                                                                                 | 858     |
| S40 | S34 OR S35 OR S36 OR S37 OR S38 OR S39                                                                                                                                                                                                                                                                                                                                                                                                                                                                                                                                                                                                                                                                                                                                                                                                              | 12,270  |
| S39 | transfer* N2 effect                                                                                                                                                                                                                                                                                                                                                                                                                                                                                                                                                                                                                                                                                                                                                                                                                                 | 549     |
| S38 | Writ* OR DE "Writing Ability" OR DE "Writing Achievement"                                                                                                                                                                                                                                                                                                                                                                                                                                                                                                                                                                                                                                                                                                                                                                                           | 141,881 |

|     |                                                                                                                                                                                                                                                                                                                        |         |
|-----|------------------------------------------------------------------------------------------------------------------------------------------------------------------------------------------------------------------------------------------------------------------------------------------------------------------------|---------|
| S37 | Numeracy OR Mathematic* OR Math                                                                                                                                                                                                                                                                                        | 122,339 |
| S36 | DE "Mathematics" OR DE "Numeracy"                                                                                                                                                                                                                                                                                      | 13,685  |
| S35 | Reading OR Literacy                                                                                                                                                                                                                                                                                                    | 193,254 |
| S34 | DE "Reading" OR DE "Literacy"                                                                                                                                                                                                                                                                                          | 20,099  |
| S33 | S27 OR S28 OR S29 OR S30 OR S31 OR S32                                                                                                                                                                                                                                                                                 | 4,526   |
| S32 | Intellect* N2 develop*                                                                                                                                                                                                                                                                                                 | 6,579   |
| S31 | DE "Intellectual Development"                                                                                                                                                                                                                                                                                          | 3,320   |
| S30 | School N1 (performan* OR achiev*)                                                                                                                                                                                                                                                                                      | 10,680  |
| S29 | Academic* N2 (performance* OR achiev* OR abilit* OR outcome*)                                                                                                                                                                                                                                                          | 93,615  |
| S28 | Learn* N2 (disab* OR Problem*)                                                                                                                                                                                                                                                                                         | 34,678  |
| S27 | DE "Academic Achievement" OR DE "Academic Ability" OR DE "Learning Problems" OR DE "Learning Disabilities"                                                                                                                                                                                                             | 102,715 |
| S26 | S22 OR S23 OR S24 OR S25                                                                                                                                                                                                                                                                                               | 11,243  |
| S25 | (Student* OR pupil*) N3 (Learn* N2 (disab* OR Problem*))                                                                                                                                                                                                                                                               | 7,982   |
| S24 | (Child* N2 (placed N1 care)) OR ((DE "Foster Care") AND child*)                                                                                                                                                                                                                                                        | 1,881   |
| S23 | ((Primary N1 School ) N3 (Student* OR pupil*)) OR ((Elementary N1 School) N3 (Student* OR pupil*)) OR (DE "Elementary School Students") OR ((Secondary N1 school) OR ( high N2 school) OR (middle N1 School) N3 (student* OR pupil*))                                                                                  | 254,280 |
| S22 | (Underachiev* OR Under N1 achiev* OR lowachiev* OR low N1 achiev* OR Low N1 perform* OR lowperform* OR (at-risk OR at N1 risk) N1 (student* OR pupil*) OR ((high-risk OR high N1 risk) N1 (student* OR pupil*)) OR ((Special N1 Need*) N1 (Student* OR pupil*)) OR ((Low N1 income) N1 (student* OR pupil*))           | 32,696  |
| S21 | S1 OR S2 OR S3 OR S4 OR S5 OR S6 OR S7 OR S8 OR S9 OR S10 OR S11 OR S12 OR S13 OR S14 OR S15 OR S16 OR S17 OR S18 OR S19 OR S20                                                                                                                                                                                        | 14,138  |
| S20 | TI (regression N1 discontinuity OR difference-in-difference* OR event N1 stud* OR interrupted time serie* OR instrumental variable* OR waitlist control*) OR AB (regression N1 discontinuity OR difference-in-difference* OR event N1 stud* OR interrupted time serie* OR instrumental variable* OR waitlist control*) | 175     |
| S19 | TI ((control N5 case) OR (control N5 subject*) OR (control N5 group*) OR (control N5 patient*) OR (control N5 intervention) ) OR AB ( (control N5 case) OR (control N5 subject*) OR (control N5 group*) OR (control N5 patient*) OR (control N5 intervention))                                                         | 1,291   |
| S18 | TI ((treatment N5 case) OR (treatment N5 subject*) OR (treatment N5 group*) OR (treatment N5 patient*) OR (treatment N5 intervention)) OR AB ((treatment N5 case) OR (treatment N5 subject*) OR (treatment N5 group*) OR (treatment N5 patient*) OR (treatment N5 intervention))                                       | 390     |
| S17 | TI ((experiment* N5 case) OR (experiment* N5 subject*) OR (experiment* N5 group*) OR (experiment* N5 patient*) OR (experiment* N5 intervention)) OR AB ( (experiment* N5 case) OR (experiment* N5 subject*) OR (experiment* N5 group*) OR (experiment* N5 patient*) OR (experiment* N5 intervention))                  | 921     |
| S16 | TI ((intervention N5 case) OR (intervention N5 subject*) OR (intervention N5 group*) OR (intervention N5 patient*) ) OR AB ( (intervention N5 case) OR (intervention N5 subject*) OR (intervention N5 group*) OR (intervention N5 patient*) )                                                                          | 447     |
| S15 | ((assign* N5 case) OR (assign* N5 subject*) OR (assign* N5 group*) OR (assign* N5 patient*) OR (assign* N5 intervention) ) OR AB ( (assign* N5 case) OR (assign* N5 subject*) OR (assign* N5 group*) OR (assign* N5 patient*) OR (assign* N5 intervention) )                                                           | 349     |

|     |                                                                                                                                                                                                                                                                                                                                                                                                                                                                                                                                                                                                                                                                                                                                                                                                                                                    |        |
|-----|----------------------------------------------------------------------------------------------------------------------------------------------------------------------------------------------------------------------------------------------------------------------------------------------------------------------------------------------------------------------------------------------------------------------------------------------------------------------------------------------------------------------------------------------------------------------------------------------------------------------------------------------------------------------------------------------------------------------------------------------------------------------------------------------------------------------------------------------------|--------|
| S14 | TI (quasi-experiment* OR quasiexperiment* OR Propensity score* OR (compar* N1 group*) OR (match* N1 control*) OR (match* N1 group*) OR (match* N1 compar*) OR experiment* trial* OR experiment* design* OR experiment* method* OR experiment* stud* OR experiment* evaluation* OR experiment* test* OR experiment* assessment* OR assessment only OR (comparison N1 samp*) OR propensity match* OR (Between N1 group*)) OR AB (quasi-experiment* OR quasiexperiment* OR Propensity score* OR (compar* N1 group*) OR (match* N1 control*) OR (match* N1 group*) OR (match* N1 compar*) OR experiment* trial* OR experiment* design* OR experiment* method* OR experiment* stud* OR experiment* evaluation* OR experiment* test* OR experiment* assessment* OR assessment only OR (comparison N1 samp*) OR propensity match* OR (Between N1 group*)) | 2,795  |
| S13 | TI ((random* N2 trial*) OR RCT) OR AB ((random* N2 trial*) OR RCT)                                                                                                                                                                                                                                                                                                                                                                                                                                                                                                                                                                                                                                                                                                                                                                                 | 338    |
| S12 | TI Non-random* OR nonradom* OR (non N1 random*) OR AB Non-random* OR Nonrandom* OR (non N1 random*)                                                                                                                                                                                                                                                                                                                                                                                                                                                                                                                                                                                                                                                                                                                                                | 43     |
| S11 | TI ((Propensity score* OR (match* N1 control*) OR (match* N1 compar*) OR assessment only OR comparison samp* OR propensity match*)) OR AB ((Propensity score* OR (match* N1 control*) OR (match* N1 compar*) OR assessment only OR comparison samp* OR propensity match*))                                                                                                                                                                                                                                                                                                                                                                                                                                                                                                                                                                         | 259    |
| S10 | TI assign* N3 (subject* OR patient*) OR AB assign* N3 (subject* OR patient*)                                                                                                                                                                                                                                                                                                                                                                                                                                                                                                                                                                                                                                                                                                                                                                       | 23     |
| S9  | TI (quasi-experiment* OR quasiexperiment* OR experiment*) OR AB (quasi-experiment* OR quasiexperiment* OR experiment*)                                                                                                                                                                                                                                                                                                                                                                                                                                                                                                                                                                                                                                                                                                                             | 3,443  |
| S8  | TI Intervention* N1 Stud* OR AB Intervention* N1 Stud*                                                                                                                                                                                                                                                                                                                                                                                                                                                                                                                                                                                                                                                                                                                                                                                             | 354    |
| S7  | TI (prospective N2 study) OR AB (prospective N2 study) OR TI retrospective OR AB retrospective                                                                                                                                                                                                                                                                                                                                                                                                                                                                                                                                                                                                                                                                                                                                                     | 240    |
| S6  | TI longitudinal OR AB longitudinal OR TI observational OR AB observational                                                                                                                                                                                                                                                                                                                                                                                                                                                                                                                                                                                                                                                                                                                                                                         | 1,452  |
| S5  | TI (epidemiologic N2 study) OR AB (epidemiologic N2 study) OR TI (follow up OR followup) N2 study OR AB (follow up OR followup) N2 study                                                                                                                                                                                                                                                                                                                                                                                                                                                                                                                                                                                                                                                                                                           | 73     |
| S4  | TI cross sectional OR AB cross sectional                                                                                                                                                                                                                                                                                                                                                                                                                                                                                                                                                                                                                                                                                                                                                                                                           | 398    |
| S3  | TI case control OR AB case control OR TI cohort OR AB cohort                                                                                                                                                                                                                                                                                                                                                                                                                                                                                                                                                                                                                                                                                                                                                                                       | 848    |
| S2  | DE "Cohort analysis"                                                                                                                                                                                                                                                                                                                                                                                                                                                                                                                                                                                                                                                                                                                                                                                                                               | 272    |
| S1  | AB randomized OR AB placebo OR AB randomly OR trial OR AB groups                                                                                                                                                                                                                                                                                                                                                                                                                                                                                                                                                                                                                                                                                                                                                                                   | 10,078 |

## PsycINFO

Searched through EBSCO-host interface. Search performed 2018/25/06. Search modes - Boolean/Phrase. Limiters - Date Published: 2016/01/03 - 2018/25/06.

| Search | Search Terms                                                                                                                                                                                                                                                                                                           | Results |
|--------|------------------------------------------------------------------------------------------------------------------------------------------------------------------------------------------------------------------------------------------------------------------------------------------------------------------------|---------|
| S42    | S20 AND S41                                                                                                                                                                                                                                                                                                            | 1,065   |
| S41    | S21 OR S22 OR S23 OR S24 OR S25 OR S26 OR S27 OR S28 OR S29 OR S30 OR S31 OR S32 OR S33 OR S34 OR S35 OR S36 OR S37 OR S38 OR S39 OR S40                                                                                                                                                                               | 105,107 |
| S40    | TI (regression N1 discontinuity OR difference-in-difference* OR event N1 stud* OR interrupted time serie* OR instrumental variable* OR waitlist control*) OR AB (regression N1 discontinuity OR difference-in-difference* OR event N1 stud* OR interrupted time serie* OR instrumental variable* OR waitlist control*) | 7,722   |

|     |                                                                                                                                                                                                                                                                                                                                                                                                                                                                                                                                                                                                                                                                                                                                                                                                                                                      |         |
|-----|------------------------------------------------------------------------------------------------------------------------------------------------------------------------------------------------------------------------------------------------------------------------------------------------------------------------------------------------------------------------------------------------------------------------------------------------------------------------------------------------------------------------------------------------------------------------------------------------------------------------------------------------------------------------------------------------------------------------------------------------------------------------------------------------------------------------------------------------------|---------|
| S39 | TI ((control N5 case) OR (control N5 subject*) OR (control N5 group*) OR (control N5 patient*) OR (control N5 intervention) ) OR AB ( (control N5 case) OR (control N5 subject*) OR (control N5 group*) OR (control N5 patient*) OR (control N5 intervention) )                                                                                                                                                                                                                                                                                                                                                                                                                                                                                                                                                                                      | 163,830 |
| S38 | TI ((treatment N5 case) OR (treatment N5 subject*) OR (treatment N5 group*) OR (treatment N5 patient*) OR (treatment N5 intervention) ) OR AB ( (treatment N5 case) OR (treatment N5 subject*) OR (treatment N5 group*) OR (treatment N5 patient*) OR (treatment N5 intervention) )                                                                                                                                                                                                                                                                                                                                                                                                                                                                                                                                                                  | 141,556 |
| S37 | TI ((experiment* N5 case) OR (experiment* N5 subject*) OR (experiment* N5 group*) OR (experiment* N5 patient*) OR (experiment* N5 intervention)) OR AB ( (experiment* N5 case) OR (experiment* N5 subject*) OR (experiment* N5 group*) OR (experiment* N5 patient*) OR (experiment* N5 intervention) )                                                                                                                                                                                                                                                                                                                                                                                                                                                                                                                                               | 50,402  |
| S36 | ((assign* N5 case) OR (assign* N5 subject*) OR (assign* N5 group*) OR (assign* N5 patient*) OR (assign* N5 intervention) ) OR AB ( (assign* N5 case) OR (assign* N5 subject*) OR (assign* N5 group*) OR (assign* N5 patient*) OR (assign* N5 intervention) )                                                                                                                                                                                                                                                                                                                                                                                                                                                                                                                                                                                         | 26,086  |
| S35 | TI ((intervention N5 case) OR (intervention N5 subject*) OR (intervention N5 group*) OR (intervention N5 patient*) ) OR AB ( (intervention N5 case) OR (intervention N5 subject*) OR (intervention N5 group*) OR (intervention N5 patient*) )                                                                                                                                                                                                                                                                                                                                                                                                                                                                                                                                                                                                        | 47,982  |
| S34 | TI ( quasi-experiment* OR quasiexperiment* OR Propensity score* OR (compar* N1 group*) OR (match* N1 control*) OR (match* N1 group*) OR (match* N1 compar*) OR experiment* trial* OR experiment* design* OR experiment* method* OR experiment* stud* OR experiment* evaluation* OR experiment* test* OR experiment* assessment* OR assessment only OR (comparison n1 samp*) OR propensity match* OR (Between N1 group*)) OR AB ( quasi-experiment* OR quasiexperiment* OR Propensity score* OR (compar* N1 group*) OR (match* N1 control*) OR (match* N1 group*) OR (match* N1 compar*) OR experiment* trial* OR experiment* design* OR experiment* method* OR experiment* stud* OR experiment* evaluation* OR experiment* test* OR experiment* assessment* OR assessment only OR (comparison N1 samp*) OR propensity match* OR (Between N1 group*)) | 235,705 |
| S33 | TI ((random* N2 trial*) OR RCT) OR AB ((random* N2 trial*) OR RCT)                                                                                                                                                                                                                                                                                                                                                                                                                                                                                                                                                                                                                                                                                                                                                                                   | 45,390  |
| S32 | TI Non-random* OR nonradom* OR (non N1 random*) OR AB Non-random* OR Nonrandom* OR (non N1 random*)                                                                                                                                                                                                                                                                                                                                                                                                                                                                                                                                                                                                                                                                                                                                                  | 4,483   |
| S31 | TI ((Propensity score* OR (match* N1 control*) OR (match* N1 compar* ) OR assessment only OR comparison samp* OR propensity match*)) OR AB ((Propensity score* OR (match* N1 control*) OR (match* N1 compar* ) OR assessment only OR comparison samp* OR propensity match*))                                                                                                                                                                                                                                                                                                                                                                                                                                                                                                                                                                         | 40,798  |
| S30 | TI assign* N3 (subject* OR patient* ) OR AB assign* N3 (subject* OR patient* )                                                                                                                                                                                                                                                                                                                                                                                                                                                                                                                                                                                                                                                                                                                                                                       | 5,453   |
| S29 | TI (quasi-experiment* OR quasiexperiment* OR experiment*) OR AB (quasi-experiment* OR quasiexperiment* OR experiment*)                                                                                                                                                                                                                                                                                                                                                                                                                                                                                                                                                                                                                                                                                                                               | 392,188 |
| S28 | TI Intervention* N1 Stud* OR AB Intervention* N1 Stud*                                                                                                                                                                                                                                                                                                                                                                                                                                                                                                                                                                                                                                                                                                                                                                                               | 13,466  |
| S27 | TI ((prospective n2 study) OR AB (prospective n2 study)) OR (TI retrospective OR AB retrospective)                                                                                                                                                                                                                                                                                                                                                                                                                                                                                                                                                                                                                                                                                                                                                   | 57,507  |
| S26 | TI longitudinal OR AB longitudinal OR TI observational OR AB observational                                                                                                                                                                                                                                                                                                                                                                                                                                                                                                                                                                                                                                                                                                                                                                           | 119,545 |
| S25 | TI (epidemiologic N2 study) OR AB (epidemiologic N2 study))OR TI (follow up OR followup) N2 study OR AB (follow up OR followup) N2 study                                                                                                                                                                                                                                                                                                                                                                                                                                                                                                                                                                                                                                                                                                             | 19,981  |
| S24 | TI cross sectional OR AB cross sectional                                                                                                                                                                                                                                                                                                                                                                                                                                                                                                                                                                                                                                                                                                                                                                                                             | 64,810  |
| S23 | TI ((case control) OR AB (case control)) OR TI cohort OR AB cohort                                                                                                                                                                                                                                                                                                                                                                                                                                                                                                                                                                                                                                                                                                                                                                                   | 79,607  |
| S22 | DE "Cohort analysis" OR DE "Case Study"                                                                                                                                                                                                                                                                                                                                                                                                                                                                                                                                                                                                                                                                                                                                                                                                              | 1,263   |
| S21 | AB randomized OR AB placebo OR AB randomly OR trial OR AB groups                                                                                                                                                                                                                                                                                                                                                                                                                                                                                                                                                                                                                                                                                                                                                                                     | 959,807 |
| S20 | S5 AND S12 AND S19                                                                                                                                                                                                                                                                                                                                                                                                                                                                                                                                                                                                                                                                                                                                                                                                                                   | 2,307   |
| S19 | S6 OR S7 OR S8 OR S9 OR S10 OR S11 OR S12 OR S13 OR S14 OR S15 OR S16 OR S17 OR S18                                                                                                                                                                                                                                                                                                                                                                                                                                                                                                                                                                                                                                                                                                                                                                  | 27,248  |

|     |                                                                                                                                                                                                                                                                                                                 |         |
|-----|-----------------------------------------------------------------------------------------------------------------------------------------------------------------------------------------------------------------------------------------------------------------------------------------------------------------|---------|
| S18 | transfer* N2 effect                                                                                                                                                                                                                                                                                             | 2,650   |
| S17 | Writ*                                                                                                                                                                                                                                                                                                           | 150,277 |
| S16 | Numeracy OR Mathematic* OR Math                                                                                                                                                                                                                                                                                 | 120,399 |
| S15 | DE "Mathematics" OR DE "Numeracy"                                                                                                                                                                                                                                                                               | 15,991  |
| S14 | Reading OR Literacy                                                                                                                                                                                                                                                                                             | 160,294 |
| S13 | DE "Reading" OR DE "Literacy"                                                                                                                                                                                                                                                                                   | 38,744  |
| S12 | S6 OR S7 OR S8 OR S9 OR S10 OR S11                                                                                                                                                                                                                                                                              | 8,523   |
| S11 | Intellect* N2 develop*                                                                                                                                                                                                                                                                                          | 47,886  |
| S10 | DE "Intellectual Development"                                                                                                                                                                                                                                                                                   | 2,906   |
| S9  | School N1 (performan* OR achiev*)                                                                                                                                                                                                                                                                               | 12,552  |
| S8  | Academic* N2 (performance* OR achiev* OR abilit* OR outcome*)                                                                                                                                                                                                                                                   | 102,020 |
| S7  | Learn* N2 (disab* OR Problem*)                                                                                                                                                                                                                                                                                  | 41,045  |
| S6  | DE "Academic Achievement" OR DE "Academic Ability" OR DE "Learning Problems" OR DE "Learning Disabilities"                                                                                                                                                                                                      | 72,815  |
| S5  | S1 OR S2 OR S3 OR S4                                                                                                                                                                                                                                                                                            | 9,425   |
| S4  | (Student* OR pupil*) N3 (Learn* N2 (disab* OR Problem*))                                                                                                                                                                                                                                                        | 7,083   |
| S3  | (Child* N2 (placed N1 care)) OR ((DE "Foster Care") AND child*)                                                                                                                                                                                                                                                 | 4,875   |
| S2  | ((Primary N1 School ) N3 (Student* OR pupil*)) OR ((Elementary N1 School) N3 (Student* OR pupil*)) OR (DE "Elementary School Students") OR ((Secondary N1 school) OR ( high N2 school) OR (middle N1 School) N3 (student* OR pupil*))                                                                           | 155,307 |
| S1  | (Underachiev* OR Under N1 achiev* OR lowachiev* OR low N1 achiev* OR Low N1 perform* OR lowerperform* OR (at-risk OR at N1 risk)) N1 (student* OR pupil*) OR ((high-risk OR high N1 risk) N1 (student* OR pupil*)) OR ((Special N1 Need*) N1 (Student* OR pupil*)) OR ((Low N1 income) N1 (student* OR pupil*)) | 10,329  |

## Socindex

Searched through EBSCO-host interface. Search performed 2018/25/06. Search modes - Boolean/Phrase. Limiters - Date Published: 2016/01/03 - 2018/25/06.

| Search | Search Terms                                                                                                                                                                                                                                                                                                           | Results |
|--------|------------------------------------------------------------------------------------------------------------------------------------------------------------------------------------------------------------------------------------------------------------------------------------------------------------------------|---------|
| S42    | S20 AND S41                                                                                                                                                                                                                                                                                                            | 91      |
| S41    | S21 OR S22 OR S23 OR S24 OR S25 OR S26 OR S27 OR S28 OR S29 OR S30 OR S31 OR S32 OR S33 OR S34 OR S35 OR S36 OR S37 OR S38 OR S39 OR S40                                                                                                                                                                               | 15,096  |
| S40    | TI (regression N1 discontinuity OR difference-in-difference* OR event N1 stud* OR interrupted time serie* OR instrumental variable* OR waitlist control*) OR AB (regression N1 discontinuity OR difference-in-difference* OR event N1 stud* OR interrupted time serie* OR instrumental variable* OR waitlist control*) | 2,256   |
| S39    | TI ((control N5 case) OR (control N5 subject*) OR (control N5 group*) OR (control N5 patient*) OR (control N5 intervention) ) OR AB ( (control N5 case) OR (control N5 subject*) OR (control N5 group*) OR (control N5 patient*) OR (control N5 intervention))                                                         | 17,748  |

|     |                                                                                                                                                                                                                                                                                                                                                                                                                                                                                                                                                                                                                                                                                                                                                                                                                                                     |         |
|-----|-----------------------------------------------------------------------------------------------------------------------------------------------------------------------------------------------------------------------------------------------------------------------------------------------------------------------------------------------------------------------------------------------------------------------------------------------------------------------------------------------------------------------------------------------------------------------------------------------------------------------------------------------------------------------------------------------------------------------------------------------------------------------------------------------------------------------------------------------------|---------|
| S38 | TI ((treatment N5 case) OR (treatment N5 subject*) OR (treatment N5 group*) OR (treatment N5 patient*) OR (treatment N5 intervention)) OR AB ((treatment N5 case) OR (treatment N5 subject*) OR (treatment N5 group*) OR (treatment N5 patient*) OR (treatment N5 intervention))                                                                                                                                                                                                                                                                                                                                                                                                                                                                                                                                                                    | 18,744  |
| S37 | TI ((experiment* N5 case) OR (experiment* N5 subject*) OR (experiment* N5 group*) OR (experiment* N5 patient*) OR (experiment* N5 intervention)) OR AB ( (experiment* N5 case) OR (experiment* N5 subject*) OR (experiment* N5 group*) OR (experiment* N5 patient*) OR (experiment* N5 intervention))                                                                                                                                                                                                                                                                                                                                                                                                                                                                                                                                               | 7,625   |
| S36 | ((assign* N5 case) OR (assign* N5 subject*) OR (assign* N5 group*) OR (assign* N5 patient*) OR (assign* N5 intervention) ) OR AB ( (assign* N5 case) OR (assign* N5 subject*) OR (assign* N5 group*) OR (assign* N5 patient*) OR (assign* N5 intervention) )                                                                                                                                                                                                                                                                                                                                                                                                                                                                                                                                                                                        | 4,356   |
| S35 | TI ((intervention N5 case) OR (intervention N5 subject*) OR (intervention N5 group*) OR (intervention N5 patient*) ) OR AB ( (intervention N5 case) OR (intervention N5 subject*) OR (intervention N5 group*) OR (intervention N5 patient*) )                                                                                                                                                                                                                                                                                                                                                                                                                                                                                                                                                                                                       | 8,148   |
| S34 | TI ( quasi-experiment* OR quasiexperiment* OR Propensity score* OR (compar* N1 group*) OR (match* N1 control*) OR (match* N1 group*) OR (match* N1 compar*) OR experiment* trial* OR experiment* design* OR experiment* method* OR experiment* stud* OR experiment* evaluation* OR experiment* test* OR experiment* assessment* OR assessment only OR (comparison N1 samp*) OR propensity match* OR (Between N1 group*)) OR AB ( quasi-experiment* OR quasiexperiment* OR Propensity score* OR (compar* N1 group*) OR (match* N1 control*) OR (match* N1 group*) OR (match* N1 compar*) OR experiment* trial* OR experiment* design* OR experiment* method* OR experiment* stud* OR experiment* evaluation* OR experiment* test* OR experiment*assessment* OR assessment only OR (comparison N1 samp*) OR propensity match* OR (Between N1 group*)) | 32,956  |
| S33 | TI ((random* N2 trial*) OR RCT) OR AB ((random* N2 trial*) OR RCT)                                                                                                                                                                                                                                                                                                                                                                                                                                                                                                                                                                                                                                                                                                                                                                                  | 6,233   |
| S32 | TI Non-random* OR nonradom* OR (non N1 random*) OR AB Non-random* OR Nonrandom* OR (non N1 random*)                                                                                                                                                                                                                                                                                                                                                                                                                                                                                                                                                                                                                                                                                                                                                 | 893     |
| S31 | TI ((Propensity score* OR (match* N1 control*) OR (match* N1 compar* ) OR assessment only OR comparison samp* OR propensity match*)) OR AB ((Propensity score* OR (match* N1 control*) OR (match* N1 compar* ) OR assessment only OR comparison samp* OR propensity match*))                                                                                                                                                                                                                                                                                                                                                                                                                                                                                                                                                                        | 4,185   |
| S30 | TI assign* N3 (subject* OR patient* ) OR AB assign* N3 (subject* OR patient* )                                                                                                                                                                                                                                                                                                                                                                                                                                                                                                                                                                                                                                                                                                                                                                      | 960     |
| S29 | TI (quasi-experiment* OR quasiexperiment* OR experiment*) OR AB (quasi-experiment* OR quasiexperiment* OR experiment*)                                                                                                                                                                                                                                                                                                                                                                                                                                                                                                                                                                                                                                                                                                                              | 51,006  |
| S28 | TI Intervention* N1 Stud* OR AB Intervention* N1 Stud*                                                                                                                                                                                                                                                                                                                                                                                                                                                                                                                                                                                                                                                                                                                                                                                              | 1,989   |
| S27 | TI ((prospective n2 study) OR AB (prospective n2 study)) OR (TI retrospective OR AB retrospective)                                                                                                                                                                                                                                                                                                                                                                                                                                                                                                                                                                                                                                                                                                                                                  | 10,706  |
| S26 | TI longitudinal OR AB longitudinal OR TI observational OR AB observational                                                                                                                                                                                                                                                                                                                                                                                                                                                                                                                                                                                                                                                                                                                                                                          | 31,832  |
| S25 | TI (epidemiologic N2 study) OR AB (epidemiologic N2 study) OR TI (follow up OR followup) N2 study OR AB (follow up OR followup) N2 study                                                                                                                                                                                                                                                                                                                                                                                                                                                                                                                                                                                                                                                                                                            | 3,515   |
| S24 | TI cross sectional OR AB cross sectional                                                                                                                                                                                                                                                                                                                                                                                                                                                                                                                                                                                                                                                                                                                                                                                                            | 12,689  |
| S23 | TI ((case control) OR AB (case control)) OR TI cohort OR AB cohort                                                                                                                                                                                                                                                                                                                                                                                                                                                                                                                                                                                                                                                                                                                                                                                  | 19,858  |
| S22 | DE "Cohort analysis" OR DE "Case Study"                                                                                                                                                                                                                                                                                                                                                                                                                                                                                                                                                                                                                                                                                                                                                                                                             | 2,082   |
| S21 | AB randomized OR AB placebo OR AB randomly OR trial OR AB groups                                                                                                                                                                                                                                                                                                                                                                                                                                                                                                                                                                                                                                                                                                                                                                                    | 272,385 |
| S20 | S5 AND S12 AND S19                                                                                                                                                                                                                                                                                                                                                                                                                                                                                                                                                                                                                                                                                                                                                                                                                                  | 213     |
| S19 | S6 OR S7 OR S8 OR S9 OR S10 OR S11 OR S12 OR S13 OR S14 OR S15 OR S16 OR S17 OR S18                                                                                                                                                                                                                                                                                                                                                                                                                                                                                                                                                                                                                                                                                                                                                                 | 5,214   |
| S18 | transfer* N2 effect                                                                                                                                                                                                                                                                                                                                                                                                                                                                                                                                                                                                                                                                                                                                                                                                                                 | 356     |
| S17 | Writ*                                                                                                                                                                                                                                                                                                                                                                                                                                                                                                                                                                                                                                                                                                                                                                                                                                               | 74,830  |

|     |                                                                                                                                                                                                                                                                                                              |        |
|-----|--------------------------------------------------------------------------------------------------------------------------------------------------------------------------------------------------------------------------------------------------------------------------------------------------------------|--------|
| S16 | Numeracy OR Mathematic* OR Math                                                                                                                                                                                                                                                                              | 27,048 |
| S15 | DE "Mathematics" OR DE "Numeracy"                                                                                                                                                                                                                                                                            | 1,864  |
| S14 | Reading OR Literacy                                                                                                                                                                                                                                                                                          | 39,382 |
| S13 | DE "Reading" OR DE "Literacy"                                                                                                                                                                                                                                                                                | 3,918  |
| S12 | S6 OR S7 OR S8 OR S9 OR S10 OR S11                                                                                                                                                                                                                                                                           | 870    |
| S11 | Intellect* N2 develop*                                                                                                                                                                                                                                                                                       | 3,034  |
| S10 | DE "Intellectual Development"                                                                                                                                                                                                                                                                                | 448    |
| S9  | School N1 (performan* OR achiev*)                                                                                                                                                                                                                                                                            | 7,676  |
| S8  | Academic* N2 (performance* OR achiev* OR abilit* OR outcome*)                                                                                                                                                                                                                                                | 13,803 |
| S7  | Learn* N2 (disab* OR Problem*)                                                                                                                                                                                                                                                                               | 5,675  |
| S6  | DE "Academic Achievement" OR DE "Academic Ability" OR DE "Learning Problems" OR DE "Learning Disabilities"                                                                                                                                                                                                   | 10,997 |
| S5  | S1 OR S2 OR S3 OR S4                                                                                                                                                                                                                                                                                         | 1,721  |
| S4  | (Student* OR pupil*) N3 (Learn* N2 (disab* OR Problem*))                                                                                                                                                                                                                                                     | 634    |
| S3  | (Child* N2 (placed N1 care)) OR ((DE "Foster Care") AND child*)                                                                                                                                                                                                                                              | 818    |
| S2  | ((Primary N1 School ) N3 (Student* OR pupil*)) OR ((Elementary N1 School) N3 (Student* OR pupil*)) OR (DE "Elementary School Students") OR ((Secondary N1 school) OR ( high N2 school) OR (middle N1 School) N3 (student* OR pupil*))                                                                        | 53,472 |
| S1  | (Underachiev* OR Under N1 achiev* OR lowachiev* OR low N1 achiev* OR Low N1 perform* OR lowperform* OR (at-risk OR at N1 risk) N1 (student* OR pupil*) OR ((high-risk OR high N1 risk) N1 (student* OR pupil*)) OR ((Special N1 Need*) N1 (Student* OR pupil*)) OR ((Low N1 income) N1 (student* OR pupil*)) | 164    |

## British Education Index

Searched through EBSCO-host interface. Search performed 2016/01/03. Search modes - Boolean/Phrase. Limiters - Date Published: 1980/01/01 - 2016/01/03.

| Search | Search Terms                                                                                                                                                                                                                                                                                                           | Results |
|--------|------------------------------------------------------------------------------------------------------------------------------------------------------------------------------------------------------------------------------------------------------------------------------------------------------------------------|---------|
| S41    | S19 AND S40                                                                                                                                                                                                                                                                                                            | 96      |
| S40    | S20 OR S21 OR S22 OR S23 OR S24 OR S25 OR S26 OR S27 OR S28 OR S29 OR S30 OR S31 OR S32 OR S33 OR S34 OR S35 OR S36 OR S37 OR S38 OR S39                                                                                                                                                                               | 13,600  |
| S39    | TI (regression N1 discontinuity OR difference-in-difference* OR event N1 stud* OR interrupted time serie* OR instrumental variable* OR waitlist control*) OR AB (regression N1 discontinuity OR difference-in-difference* OR event N1 stud* OR interrupted time serie* OR instrumental variable* OR waitlist control*) | 87      |
| S38    | TI ((control N5 case) OR (control N5 subject*) OR (control N5 group*) OR (control N5 patient*) OR (control N5 intervention)) OR AB ((control N5 case) OR (control N5 subject*) OR (control N5 group*) OR (control N5 patient*) OR (control N5 intervention))                                                           | 737     |

|     |                                                                                                                                                                                                                                                                                                                                                                                                                                                                                                                                                                                                                                                                                                                                                                                                                                                    |       |
|-----|----------------------------------------------------------------------------------------------------------------------------------------------------------------------------------------------------------------------------------------------------------------------------------------------------------------------------------------------------------------------------------------------------------------------------------------------------------------------------------------------------------------------------------------------------------------------------------------------------------------------------------------------------------------------------------------------------------------------------------------------------------------------------------------------------------------------------------------------------|-------|
| S37 | TI ((treatment N5 case) OR (treatment N5 subject*) OR (treatment N5 group*) OR (treatment N5 patient*) OR (treatment N5 intervention) ) OR AB ( (treatment N5 case) OR (treatment N5 subject*) OR (treatment N5 group*) OR (treatment N5 patient*) OR (treatment N5 intervention))                                                                                                                                                                                                                                                                                                                                                                                                                                                                                                                                                                 | 248   |
| S36 | TI ((experiment* N5 case) OR (experiment* N5 subject*) OR (experiment* N5 group*) OR (experiment* N5 patient*) OR (experiment* N5 intervention)) OR AB ((experiment* N5 case) OR (experiment* N5 subject*) OR (experiment* N5 group*) OR (experiment* N5 patient*) OR (experiment* N5 intervention))                                                                                                                                                                                                                                                                                                                                                                                                                                                                                                                                               | 487   |
| S35 | TI ((intervention N5 case) OR (intervention N5 subject*) OR (intervention N5 group*) OR (intervention N5 patient*)) OR AB ((intervention N5 case) OR (intervention N5 subject*) OR (intervention N5 group*) OR (intervention N5 patient*))                                                                                                                                                                                                                                                                                                                                                                                                                                                                                                                                                                                                         | 385   |
| S34 | ((assign* N5 case) OR (assign* N5 subject*) OR (assign* N5 group*) OR (assign* N5 patient*) OR (assign* N5 intervention)) OR AB ((assign* N5 case) OR (assign* N5 subject*) OR (assign* N5 group*) OR (assign* N5 patient*) OR (assign* N5 intervention))                                                                                                                                                                                                                                                                                                                                                                                                                                                                                                                                                                                          | 275   |
| S33 | TI (quasi-experiment* OR quasiexperiment* OR Propensity score* OR (compar* N1 group*) OR (match* N1 control*) OR (match* N1 group*) OR (match* N1 compar*) OR experiment* trial* OR experiment* design* OR experiment* method* OR experiment* stud* OR experiment* evaluation* OR experiment* test* OR experiment* assessment* OR assessment only OR (comparison n1 samp*) OR propensity match* OR (Between N1 group*)) OR AB ( quasi-experiment* OR quasiexperiment* OR Propensity score* OR (compar* N1 group*) OR (match* N1 control*) OR (match* N1 group*) OR (match* N1 compar*) OR experiment* trial* OR experiment* design* OR experiment* method* OR experiment* stud* OR experiment* evaluation* OR experiment* test* OR experiment*assessment* OR assessment only OR (comparison N1 samp*) OR propensity match* OR (Between N1 group*)) | 1,784 |
| S32 | TI ((random* N2 trial*) OR RCT) OR AB ((random* N2 trial*) OR RCT)                                                                                                                                                                                                                                                                                                                                                                                                                                                                                                                                                                                                                                                                                                                                                                                 | 250   |
| S31 | TI Non-random* OR nonradom* OR (non N1 random*) OR AB Non-random* OR Nonrandom* OR (non N1 random*)                                                                                                                                                                                                                                                                                                                                                                                                                                                                                                                                                                                                                                                                                                                                                | 19    |
| S30 | TI ((Propensity score* OR (match* N1 control*) OR (match* N1 compar* ) OR assessment only OR comparison samp* OR propensity match*)) OR AB ((Propensity score* OR (match* N1 control*) OR (match* N1 compar* ) OR assessment only OR comparison samp* OR propensity match*))                                                                                                                                                                                                                                                                                                                                                                                                                                                                                                                                                                       | 150   |
| S29 | TI assign* N3 (subject* OR patient*) OR AB assign* N3 (subject* OR patient* )                                                                                                                                                                                                                                                                                                                                                                                                                                                                                                                                                                                                                                                                                                                                                                      | 6     |
| S28 | TI (quasi-experiment* OR quasiexperiment* OR experiment*) OR AB (quasi-experiment* OR quasiexperiment* OR experiment*)                                                                                                                                                                                                                                                                                                                                                                                                                                                                                                                                                                                                                                                                                                                             | 2,939 |
| S27 | TI Intervention* N1 Stud* OR AB Intervention* N1 Stud*                                                                                                                                                                                                                                                                                                                                                                                                                                                                                                                                                                                                                                                                                                                                                                                             | 216   |
| S26 | TI ((prospective N2 study) OR AB (prospective n2 study)) OR (TI retrospective OR AB retrospective)                                                                                                                                                                                                                                                                                                                                                                                                                                                                                                                                                                                                                                                                                                                                                 | 295   |
| S25 | TI longitudinal OR AB longitudinal OR TI observational OR AB observational                                                                                                                                                                                                                                                                                                                                                                                                                                                                                                                                                                                                                                                                                                                                                                         | 1,740 |
| S24 | TI (epidemiologic N2 study) OR AB (epidemiologic N2 study) OR TI (follow up OR followup) N2 study OR AB (follow up OR followup) N2 study                                                                                                                                                                                                                                                                                                                                                                                                                                                                                                                                                                                                                                                                                                           | 152   |
| S23 | TI cross sectional OR AB cross sectional                                                                                                                                                                                                                                                                                                                                                                                                                                                                                                                                                                                                                                                                                                                                                                                                           | 340   |

|     |                                                                                                                                                                                                                                                                                                              |        |
|-----|--------------------------------------------------------------------------------------------------------------------------------------------------------------------------------------------------------------------------------------------------------------------------------------------------------------|--------|
| S22 | TI ((case control) OR AB (case control)) OR TI cohort OR AB cohort                                                                                                                                                                                                                                           | 855    |
| S21 | DE "Cohort analysis" OR DE "Case Studies"                                                                                                                                                                                                                                                                    | 360    |
| S20 | AB randomized OR AB placebo OR AB randomly OR trial OR AB groups                                                                                                                                                                                                                                             | 8,054  |
| S19 | S5 and S12 and S18                                                                                                                                                                                                                                                                                           | 487    |
| S18 | S13 OR S14 OR S15 OR S16 OR S17                                                                                                                                                                                                                                                                              | 24,585 |
| S17 | transfer* N2 effect                                                                                                                                                                                                                                                                                          | 36     |
| S16 | Numeracy OR Mathematic* OR Math*                                                                                                                                                                                                                                                                             | 12,514 |
| S15 | DE "Mathematics" OR DE "Numeracy"                                                                                                                                                                                                                                                                            | 2,099  |
| S14 | Reading OR Literacy                                                                                                                                                                                                                                                                                          | 12,850 |
| S13 | DE "Reading" OR DE "Literacy"                                                                                                                                                                                                                                                                                | 4,323  |
| S12 | S6 OR S7 OR S8 OR S9 OR S10 OR S11                                                                                                                                                                                                                                                                           | 12,568 |
| S11 | Intellect* N2 develop*                                                                                                                                                                                                                                                                                       | 1,090  |
| S10 | DE "Intellectual Development"                                                                                                                                                                                                                                                                                | 954    |
| S9  | School N1 (performan* OR achiev*)                                                                                                                                                                                                                                                                            | 967    |
| S8  | Academic* N2 (performance* OR achiev* OR abilit* OR outcome*)                                                                                                                                                                                                                                                | 5,604  |
| S7  | Learn* N2 (disab* OR Problem*)                                                                                                                                                                                                                                                                               | 5,763  |
| S6  | DE "Academic Achievement" OR DE "Academic Ability" OR DE "Learning Problems" OR DE "Learning Disabilities"                                                                                                                                                                                                   | 8,570  |
| S5  | S1 OR S2 OR S3 OR S4                                                                                                                                                                                                                                                                                         | 26,524 |
| S4  | (Student* OR pupil*) N3 (Learn* N2 (disab* OR Problem*))                                                                                                                                                                                                                                                     | 202    |
| S3  | Child* N2 placed N1 care OR (DE "foster home care") OR (DE "foster children") AND child*                                                                                                                                                                                                                     | 118    |
| S2  | ((Primary N1 School) N3 (Student* OR pupil*)) OR ((Elementary N1 School) N3 (Student* OR pupil*)) OR (DE "Elementary School Students") OR ((Secondary N1 school) OR (high N2 school) OR (middle N1 School) N3 (student* OR pupil*))                                                                          | 20,674 |
| S1  | (Underachiev* OR Under N1 achiev* OR lowachiev* OR low N1 achiev* OR Low N1 perform* OR lowperform* OR (at-risk OR at N1 risk) N1 (student* OR pupil*) OR ((high-risk OR high N1 risk) N1 (student* OR pupil*)) OR ((Special N1 Need*) N1 (Student* OR pupil*)) OR ((Low N1 income) N1 (student* OR pupil*)) | 6,091  |

## Teacher Reference Center

Searched through EBSCO-host interface. Search performed 2018/25/06. Search modes - Boolean/Phrase. Limiters - Date Published: 2016/01/03 - 2018/25/06.

| Search | Search Terms                                                                                                                                                                                                                                                                                                                                                                                                                                                                                                                                                                                                                                                                                                                                                                                                                                      | Results |
|--------|---------------------------------------------------------------------------------------------------------------------------------------------------------------------------------------------------------------------------------------------------------------------------------------------------------------------------------------------------------------------------------------------------------------------------------------------------------------------------------------------------------------------------------------------------------------------------------------------------------------------------------------------------------------------------------------------------------------------------------------------------------------------------------------------------------------------------------------------------|---------|
| S42    | S20 AND S41                                                                                                                                                                                                                                                                                                                                                                                                                                                                                                                                                                                                                                                                                                                                                                                                                                       | 188     |
| S41    | S21 OR S22 OR S23 OR S24 OR S25 OR S26 OR S27 OR S28 OR S29 OR S30 OR S31 OR S32 OR S33 OR S34 OR S35 OR S36 OR S37 OR S38 OR S39 OR S40                                                                                                                                                                                                                                                                                                                                                                                                                                                                                                                                                                                                                                                                                                          | 2,476   |
| S40    | TI (regression N1 discontinuity OR difference-in-difference* OR event N1 stud* OR interrupted time serie* OR instrumental variable* OR waitlist control*) OR AB (regression N1 discontinuity OR difference-in-difference* OR event N1 stud* OR interrupted time serie* OR instrumental variable* OR waitlist control*)                                                                                                                                                                                                                                                                                                                                                                                                                                                                                                                            | 33      |
| S39    | TI ((control N5 case) OR (control N5 subject*) OR (control N5 group*) OR (control N5 patient*) OR (control N5 intervention)) OR AB ((control N5 case) OR (control N5 subject*) OR (control N5 group*) OR (control N5 patient*) OR (control N5 intervention))                                                                                                                                                                                                                                                                                                                                                                                                                                                                                                                                                                                      | 144     |
| S38    | TI ((treatment N5 case) OR (treatment N5 subject*) OR (treatment N5 group*) OR (treatment N5 patient*) OR (treatment N5 intervention) ) OR AB ( (treatment N5 case) OR (treatment N5 subject*) OR (treatment N5 group*) OR (treatment N5 patient*) OR (treatment N5 intervention))                                                                                                                                                                                                                                                                                                                                                                                                                                                                                                                                                                | 46      |
| S37    | TI ((experiment* N5 case) OR (experiment* N5 subject*) OR (experiment* N5 group*) OR (experiment* N5 patient*) OR (experiment* N5 intervention)) OR AB ( (experiment* N5 case) OR (experiment* N5 subject*) OR (experiment* N5 group*) OR (experiment* N5 patient*) OR (experiment* N5 intervention))                                                                                                                                                                                                                                                                                                                                                                                                                                                                                                                                             | 87      |
| S36    | ((assign* N5 case) OR (assign* N5 subject*) OR (assign* N5 group*) OR (assign* N5 patient*) OR (assign* N5 intervention)) OR AB ( (assign* N5 case) OR (assign* N5 subject*) OR (assign* N5 group*) OR (assign* N5 patient*) OR (assign* N5 intervention) )                                                                                                                                                                                                                                                                                                                                                                                                                                                                                                                                                                                       | 37      |
| S35    | TI ((intervention N5 case) OR (intervention N5 subject*) OR (intervention N5 group*) OR (intervention N5 patient*) ) OR AB ( (intervention N5 case) OR (intervention N5 subject*) OR (intervention N5 group*) OR (intervention N5 patient*))                                                                                                                                                                                                                                                                                                                                                                                                                                                                                                                                                                                                      | 73      |
| S34    | TI (quasi-experiment* OR quasiexperiment* OR Propensity score* OR (compar* N1 group*) OR (match* N1 control*) OR (match* N1 group*) OR (match* N1 compar*) OR experiment* trial* OR experiment* design* OR experiment* method* OR experiment* stud* OR experiment* evaluation* OR experiment* test* OR experiment* assessment* OR assessment only OR (comparison N1 samp*) OR propensity match* OR (Between N1 group*)) OR AB (quasi-experiment* OR quasiexperiment* OR Propensity score* OR (compar* N1 group*) OR (match* N1 control*) OR (match* N1 group*) OR (match* N1 compar*) OR experiment* trial* OR experiment* design* OR experiment* method* OR experiment* stud* OR experiment* evaluation* OR experiment* test* OR experiment*assessment* OR assessment only OR (comparison N1 samp*) OR propensity match* OR (Between N1 group*)) | 424     |
| S33    | TI ((random* N2 trial*) OR RCT) OR AB ((random* N2 trial*) OR RCT)                                                                                                                                                                                                                                                                                                                                                                                                                                                                                                                                                                                                                                                                                                                                                                                | 57      |

|     |                                                                                                                                                                                                                                                                            |       |
|-----|----------------------------------------------------------------------------------------------------------------------------------------------------------------------------------------------------------------------------------------------------------------------------|-------|
| S32 | TI Non-random* OR nonradom* OR (non N1 random*) OR AB Non-random* OR Nonrandom* OR (non N1 random*)                                                                                                                                                                        | 5     |
| S31 | TI ((Propensity score* OR (match* N1 control*) OR (match* N1 compar*) OR assessment only OR comparison samp* OR propensity match*)) OR AB ((Propensity score* OR (match* N1 control*) OR (match* N1 compar*) OR assessment only OR comparison samp* OR propensity match*)) | 41    |
| S30 | TI assign* N3 (subject* OR patient* ) OR AB assign* N3 (subject* OR patient* )                                                                                                                                                                                             | 4     |
| S29 | TI (quasi-experiment* OR quasiexperiment* OR experiment*) OR AB (quasi-experiment* OR quasiexperiment* OR experiment*)                                                                                                                                                     | 586   |
| S28 | TI Intervention* N1 Stud* OR AB Intervention* N1 Stud*                                                                                                                                                                                                                     | 62    |
| S27 | TI ((prospective N2 study) OR AB (prospective N2 study)) OR (TI retrospective OR AB retrospective)                                                                                                                                                                         | 40    |
| S26 | TI longitudinal OR AB longitudinal OR TI observational OR AB observational                                                                                                                                                                                                 | 204   |
| S25 | TI (epidemiologic N2 study) OR AB (epidemiologic N2 study) OR TI (follow up OR followup) N2 study OR AB (follow up OR followup) N2 study                                                                                                                                   | 7     |
| S24 | TI cross sectional OR AB cross sectional                                                                                                                                                                                                                                   | 104   |
| S23 | TI ((case control) OR AB (case control)) OR TI cohort OR AB cohort                                                                                                                                                                                                         | 144   |
| S22 | DE "Cohort analysis" OR DE "Case Study"                                                                                                                                                                                                                                    | 4     |
| S21 | AB randomized OR AB placebo OR AB randomly OR trial OR AB groups                                                                                                                                                                                                           | 1,611 |
| S20 | S5 AND S12 AND S19                                                                                                                                                                                                                                                         | 371   |
| S19 | S6 OR S7 OR S8 OR S9 OR S10 OR S11 OR S12 OR S13 OR S14 OR S15 OR S16 OR S17 OR S18                                                                                                                                                                                        | 5,070 |
| S18 | transfer* N2 effect                                                                                                                                                                                                                                                        | 8     |
| S17 | Writ*                                                                                                                                                                                                                                                                      | 1,345 |
| S16 | Numeracy OR Mathematic* OR Math                                                                                                                                                                                                                                            | 1,834 |
| S15 | DE "Mathematics" OR DE "Numeracy"                                                                                                                                                                                                                                          | 131   |
| S14 | Reading OR Literacy                                                                                                                                                                                                                                                        | 1,708 |
| S13 | DE "Reading" OR DE "Literacy"                                                                                                                                                                                                                                              | 251   |
| S12 | S6 OR S7 OR S8 OR S9 OR S10 OR S11                                                                                                                                                                                                                                         | 1,055 |
| S11 | Intellect* N2 develop*                                                                                                                                                                                                                                                     | 14    |
| S10 | DE "Intellectual Development"                                                                                                                                                                                                                                              | 3     |
| S9  | School N1 (performan* OR achiev*)                                                                                                                                                                                                                                          | 568   |
| S8  | Academic* N2 (performance* OR achiev* OR abilit* OR outcome*)                                                                                                                                                                                                              | 791   |
| S7  | Learn* N2 (disab* OR Problem*)                                                                                                                                                                                                                                             | 224   |

|    |                                                                                                                                                                                                                                                                                                               |       |
|----|---------------------------------------------------------------------------------------------------------------------------------------------------------------------------------------------------------------------------------------------------------------------------------------------------------------|-------|
| S6 | DE "Academic Achievement" OR DE "Academic Ability" OR DE "Learning Problems" OR DE "Learning Disabilities"                                                                                                                                                                                                    | 563   |
| S5 | S1 OR S2 OR S3 OR S4                                                                                                                                                                                                                                                                                          | 2,961 |
| S4 | (Student* OR pupil*) N3 (Learn* N2 (disab* OR Problem*))                                                                                                                                                                                                                                                      | 65    |
| S3 | (Child* N2 (placed N1 care)) OR ((DE "Foster Care") AND child*)                                                                                                                                                                                                                                               | 186   |
| S2 | ((Primary N1 School) N3 (Student* OR pupil*)) OR ((Elementary N1 School) N3 (Student* OR pupil*)) OR (DE "Elementary School Students") OR ((Secondary N1 school) OR (high N2 school) OR (middle N1 School) N3 (student* OR pupil*))                                                                           | 2,748 |
| S1 | (Underachiev* OR Under N1 achiev* OR lowachiev* OR low N1 achiev* OR Low N1 perform* OR lowperform* OR (at-risk OR at N1 risk)) N1 (student* OR pupil*) OR ((high-risk OR high N1 risk) N1 (student* OR pupil*)) OR ((Special N1 Need*) N1 (Student* OR pupil*)) OR ((Low N1 income) N1 (student* OR pupil*)) | 236   |

## ECONLIT

Searched through EBSCO-host interface. Search performed 2018/25/06. Search modes - Boolean/Phrase. Limiters - Date Published: 2016/01/03 - 2018/25/06.

| Search | Search Terms                                                                                                                                                                                                                                                                                                           | Results |
|--------|------------------------------------------------------------------------------------------------------------------------------------------------------------------------------------------------------------------------------------------------------------------------------------------------------------------------|---------|
| S36    | S7 AND S14 AND S35                                                                                                                                                                                                                                                                                                     | 16      |
| S35    | S15 OR S16 OR S17 OR S18 OR S19 OR S20 OR S21 OR S22 OR S23 OR S24 OR S25 OR S26 OR S27 OR S28 OR S29 OR S30 OR S31 OR S32 OR S33 OR S34                                                                                                                                                                               | 21,291  |
| S34    | TI (regression N1 discontinuity OR difference-in-difference* OR event N1 stud* OR interrupted time serie* OR instrumental variable* OR waitlist control*) OR AB (regression N1 discontinuity OR difference-in-difference* OR event N1 stud* OR interrupted time serie* OR instrumental variable* OR waitlist control*) | 3,187   |
| S33    | TI ((control N5 case) OR (control N5 subject*) OR (control N5 group*) OR (control N5 patient*) OR (control N5 intervention)) OR AB ((control N5 case) OR (control N5 subject*) OR (control N5 group*) OR (control N5 patient*) OR (control N5 intervention))                                                           | 675     |
| S32    | TI ((treatment N5 case) OR (treatment N5 subject*) OR (treatment N5 group*) OR (treatment N5 patient*) OR (treatment N5 intervention) ) OR AB ( (treatment N5 case) OR (treatment N5 subject*) OR (treatment N5 group*) OR (treatment N5 patient*) OR (treatment N5 intervention))                                     | 454     |
| S31    | TI ((experiment* N5 case) OR (experiment* N5 subject*) OR (experiment* N5 group*) OR (experiment* N5 patient*) OR (experiment* N5 intervention)) OR AB ( (experiment* N5 case) OR (experiment* N5 subject*) OR (experiment* N5 group*) OR (experiment* N5 patient*) OR (experiment* N5 intervention))                  | 514     |

|     |                                                                                                                                                                                                                                                                                                                                                                                                                                                                                                                                                                                                                                                                                                                                                                                                                                                    |       |
|-----|----------------------------------------------------------------------------------------------------------------------------------------------------------------------------------------------------------------------------------------------------------------------------------------------------------------------------------------------------------------------------------------------------------------------------------------------------------------------------------------------------------------------------------------------------------------------------------------------------------------------------------------------------------------------------------------------------------------------------------------------------------------------------------------------------------------------------------------------------|-------|
| S30 | TI ((intervention N5 case) OR (intervention N5 subject*) OR (intervention N5 group*) OR (intervention N5 patient*)) OR AB ( (intervention N5 case) OR (intervention N5 subject*) OR (intervention N5 group*) OR (intervention N5 patient*))                                                                                                                                                                                                                                                                                                                                                                                                                                                                                                                                                                                                        | 132   |
| S29 | ((assign* N5 case) OR (assign* N5 subject*) OR (assign* N5 group*) OR (assign* N5 patient*) OR (assign* N5 intervention)) OR AB ((assign* N5 case) OR (assign* N5 subject*) OR (assign* N5 group*) OR (assign* N5 patient*) OR (assign* N5 intervention))                                                                                                                                                                                                                                                                                                                                                                                                                                                                                                                                                                                          | 168   |
| S28 | TI (quasi-experiment* OR quasiexperiment* OR Propensity score* OR (compar* N1 group*) OR (match* N1 control*) OR (match* N1 group*) OR (match* N1 compar*) OR experiment* trial* OR experiment* design* OR experiment* method* OR experiment* stud* OR experiment* evaluation* OR experiment* test* OR experiment* assessment* OR assessment only OR (comparison N1 samp*) OR propensity match* OR (Between N1 group*)) OR AB ( quasi-experiment* OR quasiexperiment* OR Propensity score* OR (compar* N1 group*) OR (match* N1 control*) OR (match* N1 group*) OR (match* N1 compar*) OR experiment* trial* OR experiment* design* OR experiment* method* OR experiment* stud* OR experiment* evaluation* OR experiment* test* OR experiment*assessment* OR assessment only OR (comparison N1 samp*) OR propensity match* OR (Between N1 group*)) | 3,152 |
| S27 | TI ((random* N2 trial*) OR RCT) OR AB ((random* N2 trial*) OR RCT)                                                                                                                                                                                                                                                                                                                                                                                                                                                                                                                                                                                                                                                                                                                                                                                 | 304   |
| S26 | TI Non-random* OR nonradom* OR (non N1 random*) OR AB Non-random* OR Nonrandom* OR (non N1 random*)                                                                                                                                                                                                                                                                                                                                                                                                                                                                                                                                                                                                                                                                                                                                                | 121   |
| S25 | TI ((Propensity score* OR (match* N1 control*) OR (match* N1 compar* ) OR assessment only OR comparison samp* OR propensity match*)) OR AB ((Propensity score* OR (match* N1 control*) OR (match* N1 compar* ) OR assessment only OR comparison samp* OR propensity match*))                                                                                                                                                                                                                                                                                                                                                                                                                                                                                                                                                                       | 632   |
| S24 | TI assign* N3 (subject* OR patient*) OR AB assign* N3 (subject* OR patient*)                                                                                                                                                                                                                                                                                                                                                                                                                                                                                                                                                                                                                                                                                                                                                                       | 43    |
| S23 | TI (quasi-experiment* OR quasiexperiment* OR experiment*) OR AB (quasi-experiment* OR quasiexperiment* OR experiment*)                                                                                                                                                                                                                                                                                                                                                                                                                                                                                                                                                                                                                                                                                                                             | 6,845 |
| S22 | TI (Intervention* N1 Stud*) OR AB (Intervention* N1 Stud*)                                                                                                                                                                                                                                                                                                                                                                                                                                                                                                                                                                                                                                                                                                                                                                                         | 46    |
| S21 | TI ((prospective N2 study) OR AB (prospective N2 study)) OR (TI retrospective OR AB retrospective)                                                                                                                                                                                                                                                                                                                                                                                                                                                                                                                                                                                                                                                                                                                                                 | 226   |
| S20 | TI longitudinal OR AB longitudinal OR TI observational OR AB observational                                                                                                                                                                                                                                                                                                                                                                                                                                                                                                                                                                                                                                                                                                                                                                         | 1,539 |
| S19 | TI (epidemiologic N2 study) OR AB (epidemiologic N2 study) OR TI (follow up OR followup) N2 study OR AB (follow up OR followup) N2 study                                                                                                                                                                                                                                                                                                                                                                                                                                                                                                                                                                                                                                                                                                           | 31    |
| S18 | TI cross sectional OR AB cross sectional                                                                                                                                                                                                                                                                                                                                                                                                                                                                                                                                                                                                                                                                                                                                                                                                           | 1,418 |
| S17 | TI ((case control) OR AB (case control)) OR TI cohort OR AB cohort                                                                                                                                                                                                                                                                                                                                                                                                                                                                                                                                                                                                                                                                                                                                                                                 | 1,122 |
| S16 | DE "Cohort analysis" OR DE "Case Studies"                                                                                                                                                                                                                                                                                                                                                                                                                                                                                                                                                                                                                                                                                                                                                                                                          | 0     |
| S15 | AB randomized OR AB placebo OR AB randomly OR trial OR AB groups                                                                                                                                                                                                                                                                                                                                                                                                                                                                                                                                                                                                                                                                                                                                                                                   | 9,446 |
| S14 | S8 OR S9 OR S10 OR S11 OR S12 OR S13                                                                                                                                                                                                                                                                                                                                                                                                                                                                                                                                                                                                                                                                                                                                                                                                               | 5,259 |
| S13 | transfer* N2 effect                                                                                                                                                                                                                                                                                                                                                                                                                                                                                                                                                                                                                                                                                                                                                                                                                                | 113   |

|     |                                                                                                            |       |
|-----|------------------------------------------------------------------------------------------------------------|-------|
| S12 | Writ* OR DE "Writing Ability" OR DE "Writing Achievement"                                                  | 1,176 |
| S11 | Numeracy OR Mathematic* OR Math                                                                            | 3,061 |
| S10 | DE "Mathematics" OR DE "Numeracy"                                                                          | 0     |
| S9  | Reading OR Literacy                                                                                        | 0     |
| S8  | DE "Reading" OR DE "Literacy"                                                                              | 0     |
| S7  | S1 OR S2 OR S3 OR S4 OR S5 OR S6                                                                           | 1,096 |
| S6  | Intellect* N2 develop*                                                                                     | 657   |
| S5  | DE "Intellectual Development"                                                                              | 0     |
| S4  | School N1 (performan* OR achiev*)                                                                          | 137   |
| S3  | Academic* N2 (performance* OR achiev* OR abilit* OR outcome*)                                              | 304   |
| S2  | Learn* N2 (disab* OR Problem*)                                                                             | 24    |
| S1  | DE "Academic Achievement" OR DE "Academic Ability" OR DE "Learning Problems" OR DE "Learning Disabilities" | 0     |

## FRANCIS

Searched through EBSCO-host interface. Search modes - Boolean/Phrase. Limiters - Date  
Published: 19800101-20160203.

| Search | Search Terms                                                                                                                                                                                                                                                                                                           | Results |
|--------|------------------------------------------------------------------------------------------------------------------------------------------------------------------------------------------------------------------------------------------------------------------------------------------------------------------------|---------|
| S41    | S19 AND S40                                                                                                                                                                                                                                                                                                            | 165     |
| S40    | S20 OR S21 OR S22 OR S23 OR S24 OR S25 OR S26 OR S27 OR S28 OR S29 OR S30 OR S31 OR S32 OR S33 OR S34 OR S35 OR S36 OR S37 OR S38 OR S39                                                                                                                                                                               | 401,117 |
| S39    | TI (regression N1 discontinuity OR difference-in-difference* OR event N1 stud* OR interrupted time serie* OR instrumental variable* OR waitlist control*) OR AB (regression N1 discontinuity OR difference-in-difference* OR event N1 stud* OR interrupted time serie* OR instrumental variable* OR waitlist control*) | 1,376   |
| S38    | TI (control N5 case) OR (control N5 subject*) OR (control N5 group*) OR (control N5 patient*) OR (control N5 intervention) OR AB (control N5 case) OR (control N5 subject*) OR (control N5 group*) OR (control N5 patient*) OR (control N5 intervention)                                                               | 36,547  |
| S37    | TI (treatment N5 case) OR (treatment N5 subject*) OR (treatment N5 group*) OR (treatment N5 patient*) OR (treatment N5 intervention) OR AB (treatment N5 case) OR (treatment N5 subject*) OR (treatment N5 group*) OR (treatment N5 patient*) OR (treatment N5 intervention)                                           | 25,364  |
| S36    | TI (experiment* N5 case) OR (experiment* N5 subject*) OR (experiment* N5 group*) OR (experiment* N5 patient*) OR (experiment* N5 intervention) OR AB (experiment* N5 case) OR                                                                                                                                          | 9,282   |

|     |                                                                                                                                                                                                                                                                                                                                                                                                                                                                                                                                                                                                                                                                                                                                                                                                                                                          |         |
|-----|----------------------------------------------------------------------------------------------------------------------------------------------------------------------------------------------------------------------------------------------------------------------------------------------------------------------------------------------------------------------------------------------------------------------------------------------------------------------------------------------------------------------------------------------------------------------------------------------------------------------------------------------------------------------------------------------------------------------------------------------------------------------------------------------------------------------------------------------------------|---------|
|     | (experiment* N5 subject*) OR (experiment* N5 group*) OR (experiment* N5 patient*) OR (experiment* N5 intervention)                                                                                                                                                                                                                                                                                                                                                                                                                                                                                                                                                                                                                                                                                                                                       |         |
| S35 | TI (intervention N5 case) OR (intervention N5 subject*) OR (intervention N5 group*) OR (intervention N5 patient*) OR AB (intervention N5 case) OR (intervention N5 subject*) OR (intervention N5 group*) OR (intervention N5 patient*)                                                                                                                                                                                                                                                                                                                                                                                                                                                                                                                                                                                                                   | 6,806   |
| S34 | (assign* N5 case) OR (assign* N5 subject*) OR (assign* N5 group*) OR (assign* N5 patient*) OR (assign* N5 intervention) OR AB (assign* N5 case) OR (assign* N5 subject*) OR (assign* N5 group*) OR (assign* N5 patient*) OR (assign* N5 intervention)                                                                                                                                                                                                                                                                                                                                                                                                                                                                                                                                                                                                    | 4,633   |
| S33 | TI ((quasi-experiment* OR quasiexperiment* OR Propensity score* OR (compar* N1 group*) OR (match* N1 control*) OR (match* N1 group*) OR (match* N1 compar*) OR experiment* trial* OR experiment* design* OR experiment* method* OR experiment* stud* OR experiment* evaluation* OR experiment* test* OR experiment* assessment* OR assessment only OR (comparison N1 samp*) OR propensity match* OR (Between N1 group*)) ) OR AB ( (quasi-experiment* OR quasiexperiment* OR Propensity score* OR (compar* N1 group*) OR (match* N1 control*) OR (match* N1 group*) OR (match* N1 compar*) OR experiment* trial* OR experiment* design* OR experiment* method* OR experiment* stud* OR experiment* evaluation* OR experiment* test* OR experiment* assessment* OR assessment only OR (comparison N1 samp*) OR propensity match* OR (Between N1 group*))) | 48,429  |
| S32 | AB (((random* N2 trial*) OR RCT)) OR TI (((random* N2 trial*) OR RCT))                                                                                                                                                                                                                                                                                                                                                                                                                                                                                                                                                                                                                                                                                                                                                                                   | 8,822   |
| S31 | TI (Non-random* OR nonradom* OR (non N1 random*)) OR AB (Non-random* OR nonradom* OR (non N1 random*))                                                                                                                                                                                                                                                                                                                                                                                                                                                                                                                                                                                                                                                                                                                                                   | 456     |
| S30 | TI (((Propensity score* OR (match* N1 control*) OR (match* N1 compar*) OR assessment only OR comparison samp* OR propensity match*))) OR AB (((Propensity score* OR (match* N1 control*) OR (match* N1 compar*) OR assessment only OR comparison samp* OR propensity match*)))                                                                                                                                                                                                                                                                                                                                                                                                                                                                                                                                                                           | 10,546  |
| S29 | TI (assign* N3 (subject* or patient*)) OR AB (assign* N3 (subject* or patient*))                                                                                                                                                                                                                                                                                                                                                                                                                                                                                                                                                                                                                                                                                                                                                                         | 1,707   |
| S28 | TI (quasi-experiment* OR quasiexperiment* OR experiment*) OR AB (quasi-experiment* OR quasiexperiment* OR experiment*)                                                                                                                                                                                                                                                                                                                                                                                                                                                                                                                                                                                                                                                                                                                                   | 92,283  |
| S27 | TI Intervention* N1 Stud* OR AB Intervention* N1 Stud*                                                                                                                                                                                                                                                                                                                                                                                                                                                                                                                                                                                                                                                                                                                                                                                                   | 1,582   |
| S26 | TI (prospective N2 stud*) OR AB (prospective N2 stud*) OR TI retrospective OR AB retrospective                                                                                                                                                                                                                                                                                                                                                                                                                                                                                                                                                                                                                                                                                                                                                           | 16,639  |
| S25 | TI longitudinal OR AB longitudinal OR TI observational OR AB observational                                                                                                                                                                                                                                                                                                                                                                                                                                                                                                                                                                                                                                                                                                                                                                               | 25,456  |
| S24 | TI epidemiologic N2 study OR AB epidemiologic N2 study OR TI (follow up OR followup) N2 stud* OR AB (follow up OR followup) N2 stud*                                                                                                                                                                                                                                                                                                                                                                                                                                                                                                                                                                                                                                                                                                                     | 4,981   |
| S23 | TI cross sectional OR AB cross sectional                                                                                                                                                                                                                                                                                                                                                                                                                                                                                                                                                                                                                                                                                                                                                                                                                 | 11,411  |
| S22 | AB case control OR TI case control OR AB cohort OR TI cohort                                                                                                                                                                                                                                                                                                                                                                                                                                                                                                                                                                                                                                                                                                                                                                                             | 18,411  |
| S21 | DE "Cohort analysis" or DE "Case study" OR DE "Case studies"                                                                                                                                                                                                                                                                                                                                                                                                                                                                                                                                                                                                                                                                                                                                                                                             | 33,980  |
| S20 | AB randomized OR placebo OR random* OR trial* OR group*                                                                                                                                                                                                                                                                                                                                                                                                                                                                                                                                                                                                                                                                                                                                                                                                  | 234,375 |
| S19 | S5 AND S12 AND S18                                                                                                                                                                                                                                                                                                                                                                                                                                                                                                                                                                                                                                                                                                                                                                                                                                       | 363     |

|     |                                                                                                                                                                                                                                                                                                              |        |
|-----|--------------------------------------------------------------------------------------------------------------------------------------------------------------------------------------------------------------------------------------------------------------------------------------------------------------|--------|
| S18 | S13 OR S14 OR S15 OR S16 OR S17                                                                                                                                                                                                                                                                              | 25,441 |
| S17 | TI transfer* N2 effect* OR AB transfer* N2 effect*                                                                                                                                                                                                                                                           | 554    |
| S16 | AB (Numeracy OR Mathematic* OR Math*) AND TI (Numeracy OR Mathematic* OR Math*)                                                                                                                                                                                                                              | 4,798  |
| S15 | DE "Mathematics" OR DE "Numeracy"                                                                                                                                                                                                                                                                            | 7,926  |
| S14 | TI (Reading OR Literacy) AND AB (Reading OR Literacy)                                                                                                                                                                                                                                                        | 5,103  |
| S13 | DE "Reading" OR DE "Literacy"                                                                                                                                                                                                                                                                                | 12,790 |
| S12 | S6 OR S7 OR S8 OR S9 OR S10 OR S11                                                                                                                                                                                                                                                                           | 17,156 |
| S11 | TI Intellect* N2 develop* OR AB Intellect* N2 develop*                                                                                                                                                                                                                                                       | 1,132  |
| S10 | DE "Intellectual Development"                                                                                                                                                                                                                                                                                | 3,281  |
| S9  | TI School N1 (performan* or achiev*) OR AB School N1 (performan* or achiev*)                                                                                                                                                                                                                                 | 1,512  |
| S8  | TI Academic* N2 (performance* OR achiev* OR abilit* OR outcome*) OR AB Academic* N2 (performance* OR achiev* OR abilit* OR outcome*)                                                                                                                                                                         | 3,857  |
| S7  | AB (Learn* N2 (disab* OR problem* ) OR TI ( Learn* N2 (disab* OR problem*)))                                                                                                                                                                                                                                 | 4,293  |
| S6  | DE "Academic Achievement" or DE "Academic Ability" or DE "Learning Problems" OR DE "learning proces or DE "Learning Disabilities" OR DE "learning disability"                                                                                                                                                | 6,205  |
| S5  | S2 OR S3 OR S4                                                                                                                                                                                                                                                                                               | 15,309 |
| S4  | TI (Student* OR pupil*) N3 (Learn* N2 (disab* OR Problem*)) OR AB (Student* OR pupil*) N3 (Learn* N2 (disab* OR Problem*))                                                                                                                                                                                   | 710    |
| S3  | TI ((Child* N2 placed N1 care) OR (DE "Foster Care") AND child*) OR AB ((Child* N2 placed N1 care) OR (DE "Foster Care") AND child*)                                                                                                                                                                         | 202    |
| S2  | ((Primary N1 school*) N3 (Student* OR pupil*)) OR ((Elementary N1 school) N3 (Student* OR pupil*)) OR (DE "Elementary School Students") OR (DE "Elementary students" OR ((Secondary N1 school*) OR (high N2 school*) OR (middle N1 school*) N3 (student* OR pupil*)) )                                       | 14,485 |
| S1  | (Underachiev* OR Under N1 achiev* OR lowachiev* OR low N1 achiev* OR Low N1 perform* OR lowperform* OR (at-risk or at N1 risk) N1 (student* OR pupil*) OR ((high-risk OR high N1 risk) N1 (student* OR pupil*)) OR ((Special N1 Need*) N1 (Student* OR pupil*)) OR ((Low N1 income) N1 (student* OR pupil*)) | 770    |

## Dissertations and Theses A&I

Search string reported in the grey literature section.

## CBCA Education

Searched through ProQuest interface. Searched 02/03/2016. Limiters - Date Published: 01/01/1980 - 2016/02/03.

| Search | Search Terms                                                                                                                                                                                                                                                                                                                                                                                                                                                                                                                                                                                                                                                                                                                                                                                                                       | Results |
|--------|------------------------------------------------------------------------------------------------------------------------------------------------------------------------------------------------------------------------------------------------------------------------------------------------------------------------------------------------------------------------------------------------------------------------------------------------------------------------------------------------------------------------------------------------------------------------------------------------------------------------------------------------------------------------------------------------------------------------------------------------------------------------------------------------------------------------------------|---------|
| S1     | TI((Underachiev* OR Under NEAR/1 (achiev* or lowachiev*)) OR (low NEAR/2 (achiev*)) OR (Low NEAR/1 (perform* OR lowperform*)) OR ((at-risk OR at NEAR/1 (risk)) NEAR/1 (student* OR pupil*)) OR ((high-risk OR high NEAR/1 (risk)) NEAR/1 (student* OR pupil*)) OR ((Special NEAR/1 (Need*)) NEAR/1 (Student* OR pupil*)) OR ((Low NEAR/1 (income)) NEAR/1 (student* OR pupil*)))                                                                                                                                                                                                                                                                                                                                                                                                                                                  | 203     |
| S2     | TI(((Primary NEAR/1 (School)) NEAR/3 (Student* OR pupil*)) OR ((Elementary NEAR/1 (School)) NEAR/3 (Student* OR pupil*)) OR ((Secondary NEAR/1 (school*)) OR (high NEAR/2 (school*)) OR (middle NEAR/2 (School*)) NEAR/3 (student* OR pupil*)))                                                                                                                                                                                                                                                                                                                                                                                                                                                                                                                                                                                    | 1612    |
| S3     | TI((Child* NEAR/2 (placed) NEAR/1 (care)))                                                                                                                                                                                                                                                                                                                                                                                                                                                                                                                                                                                                                                                                                                                                                                                         | 1       |
| S4     | ((SU("Foster Care")) AND child*)                                                                                                                                                                                                                                                                                                                                                                                                                                                                                                                                                                                                                                                                                                                                                                                                   | 39      |
| S5     | TI((Student* OR pupil* NEAR/3 (Learn*) NEAR/2 (disab* OR problem*)))                                                                                                                                                                                                                                                                                                                                                                                                                                                                                                                                                                                                                                                                                                                                                               | 6839    |
| S6     | (TI((Underachiev* OR Under NEAR/1 (achiev* OR lowachiev*)) OR (low NEAR/2 (achiev*)) OR (Low NEAR/1 (perform* OR lowperform*)) OR ((at-risk OR at NEAR/1 (risk)) NEAR/1 (student* OR pupil*)) OR ((high-risk OR high NEAR/1 (risk)) NEAR/1 (student* OR pupil*)) OR ((Special NEAR/1 (Need*)) NEAR/1 (Student* OR pupil*)) OR ((Low NEAR/1 (income)) NEAR/1 (student* OR pupil*))) OR TI(((Primary NEAR/1 (School)) CBCA Education NEAR/1 (School)) NEAR/3 (Student* OR pupil*)) OR ((Elementary NEAR/1 (School)) NEAR/3 (Student* OR pupil*)) OR ((Secondary NEAR/1 (school*)) OR (high NEAR/2 (school*)) OR (middle NEAR/2 (School*)) NEAR/3 (student* OR pupil*))) OR TI((Child* NEAR/2 (placed) NEAR/1 (care)) ) OR ((SU("Foster Care")) AND child*) OR (TI((Student* OR pupil* NEAR/3 (Learn*) NEAR/2 (disab* OR problem*)))) | 8017    |
| S7     | (SU("Academic Achievement") OR SU("academic achievement gaps") OR SU("Learning") OR SU("Learning Disabilities"))                                                                                                                                                                                                                                                                                                                                                                                                                                                                                                                                                                                                                                                                                                                   | 9482    |
| S8     | TI((Learn* NEAR/2 (disab* OR Problem*)))                                                                                                                                                                                                                                                                                                                                                                                                                                                                                                                                                                                                                                                                                                                                                                                           | 360     |
| S9     | TI((Academic* NEAR/2 (performance* OR achiev* OR abilit* OR outcome*)))                                                                                                                                                                                                                                                                                                                                                                                                                                                                                                                                                                                                                                                                                                                                                            | 113     |
| S10    | TI((School NEAR/1 (performan* OR achiev*)))                                                                                                                                                                                                                                                                                                                                                                                                                                                                                                                                                                                                                                                                                                                                                                                        | 56      |
| S11    | TI((Intellect* NEAR/2 (develop*)))                                                                                                                                                                                                                                                                                                                                                                                                                                                                                                                                                                                                                                                                                                                                                                                                 | 15      |
| S12    | (SU("Academic Achievement") OR SU("academic achievement gaps") OR SU("Learning") OR SU("Learning Disabilities")) OR TI((Learn* NEAR/2 (disab* OR Problem*))) OR TI((Academic* NEAR/2 (performance* OR achiev* OR abilit* OR outcome*))) OR TI((School NEAR/1 (performan* OR achiev*))) OR TI((Intellect* NEAR/2 (develop*)))                                                                                                                                                                                                                                                                                                                                                                                                                                                                                                       | 9618    |
| S13    | SU("Reading") OR SU("literacy")                                                                                                                                                                                                                                                                                                                                                                                                                                                                                                                                                                                                                                                                                                                                                                                                    | 4527    |
| S14    | SU("Mathematics") OR SU("Mathematics education")                                                                                                                                                                                                                                                                                                                                                                                                                                                                                                                                                                                                                                                                                                                                                                                   | 2406    |
| S15    | TI((transfer* NEAR/2 (effect)))                                                                                                                                                                                                                                                                                                                                                                                                                                                                                                                                                                                                                                                                                                                                                                                                    | 1       |
| S16    | S13 OR S14 OR S15                                                                                                                                                                                                                                                                                                                                                                                                                                                                                                                                                                                                                                                                                                                                                                                                                  | 6888    |
| S17    | S6 AND S12 AND S16                                                                                                                                                                                                                                                                                                                                                                                                                                                                                                                                                                                                                                                                                                                                                                                                                 | 91      |

|     |                                                                                                                                                                                                                                                                                                                                                                                                                                                                                                                                                                                                                                                                                                                                                                                                                                                                                                                               |       |
|-----|-------------------------------------------------------------------------------------------------------------------------------------------------------------------------------------------------------------------------------------------------------------------------------------------------------------------------------------------------------------------------------------------------------------------------------------------------------------------------------------------------------------------------------------------------------------------------------------------------------------------------------------------------------------------------------------------------------------------------------------------------------------------------------------------------------------------------------------------------------------------------------------------------------------------------------|-------|
| S18 | (AB(randomized) OR AB(placebo) OR AB(randomly) OR AB(trial) OR AB(groups))                                                                                                                                                                                                                                                                                                                                                                                                                                                                                                                                                                                                                                                                                                                                                                                                                                                    | 3741  |
| S19 | SU("Cohort") OR SU("case studies")                                                                                                                                                                                                                                                                                                                                                                                                                                                                                                                                                                                                                                                                                                                                                                                                                                                                                            | 199   |
| S20 | TI(case control) OR AB(case control) OR TI(cohort) OR AB(cohort)                                                                                                                                                                                                                                                                                                                                                                                                                                                                                                                                                                                                                                                                                                                                                                                                                                                              | 268   |
| S21 | TI(cross sectional) OR AB(cross sectional)                                                                                                                                                                                                                                                                                                                                                                                                                                                                                                                                                                                                                                                                                                                                                                                                                                                                                    | 23    |
| S22 | TI(epidemiologic NEAR/2 study) OR AB(epidemiologic NEAR/2 study)                                                                                                                                                                                                                                                                                                                                                                                                                                                                                                                                                                                                                                                                                                                                                                                                                                                              | 0     |
| S23 | TI(followup NEAR/2 study) OR AB(followup NEAR/2 study)                                                                                                                                                                                                                                                                                                                                                                                                                                                                                                                                                                                                                                                                                                                                                                                                                                                                        | 0     |
| S24 | TI(longitudinal) OR AB(longitudinal) OR TI(observational) OR AB(observational)                                                                                                                                                                                                                                                                                                                                                                                                                                                                                                                                                                                                                                                                                                                                                                                                                                                | 163   |
| S25 | (TI(prospective NEAR/2 study) OR AB(prospective NEAR/2 study) OR TI(retrospective) OR AB(retrospective))                                                                                                                                                                                                                                                                                                                                                                                                                                                                                                                                                                                                                                                                                                                                                                                                                      | 72    |
| S26 | TI(Intervention* NEAR/1 Stud*) OR AB(Intervention* NEAR/1 Stud*)                                                                                                                                                                                                                                                                                                                                                                                                                                                                                                                                                                                                                                                                                                                                                                                                                                                              | 30    |
| S27 | TI(assign* NEAR/3 (subject* OR patient*))                                                                                                                                                                                                                                                                                                                                                                                                                                                                                                                                                                                                                                                                                                                                                                                                                                                                                     | 0     |
| S28 | TI(quasi-experiment* OR quasiexperiment* OR experiment*) OR AB(quasiexperiment* OR quasiexperiment* OR experiment*)                                                                                                                                                                                                                                                                                                                                                                                                                                                                                                                                                                                                                                                                                                                                                                                                           | 1052  |
| S29 | AB(assign* NEAR/3 (subject* OR patient*))                                                                                                                                                                                                                                                                                                                                                                                                                                                                                                                                                                                                                                                                                                                                                                                                                                                                                     | 8     |
| S30 | TI(Propensity score* OR match* NEAR/1 (control*)) OR (match* NEAR/1 ( compar*)) OR (assessment only OR comparison samp* OR propensity match*) OR AB(Propensity score* OR (match* NEAR/1 control*)) OR (match* NEAR/1 compar*) OR (assessment only OR comparison samp* OR propensity match*))                                                                                                                                                                                                                                                                                                                                                                                                                                                                                                                                                                                                                                  | 7368  |
| S31 | TI(Non-random* OR nonradom* OR (non NEAR/1 random*)) OR AB(Nonrandom* OR Nonrandom* OR (non NEAR/1 random*))                                                                                                                                                                                                                                                                                                                                                                                                                                                                                                                                                                                                                                                                                                                                                                                                                  | 8     |
| S32 | TI(random* NEAR/2 (trial* OR RCT)) OR AB(random* NEAR/2 (trial* OR RCT))                                                                                                                                                                                                                                                                                                                                                                                                                                                                                                                                                                                                                                                                                                                                                                                                                                                      | 9     |
| S33 | TI(quasi-experiment* OR quasiexperiment* OR Propensity score* OR (compar* NEAR/1 (group*))) OR (match* NEAR/1 (control*)) OR (match* NEAR/1 (group*)) OR (match* NEAR/1 (compar*)) OR (experiment* trial* OR experiment* design* OR experiment* method* OR experiment* stud* OR experiment* evaluation* OR experiment* test* OR experiment* assessment* OR assessment only OR (comparison NEAR/1 (samp*))) OR propensity match* OR (Between NEAR/1 (group*)) OR AB(quasi-experiment* OR quasiexperiment* OR Propensity score* OR (compar* NEAR/1 (group*))) OR (match* NEAR/1 (control*)) OR (match* NEAR/1 (group*)) OR (match* NEAR/1 (compar*)) OR (experiment* trial* OR experiment* design* OR experiment* method* OR experiment* stud* OR experiment* evaluation* OR experiment* test* OR experiment*assessment* OR assessment only OR (comparison NEAR/1 (samp*))) OR (propensity match* OR (Between NEAR/1 (group*))) | 10320 |
| S34 | AB(assign* NEAR/5 (case*)) OR AB(assign* NEAR/5 (subject*)) OR AB(assign* NEAR/5 (group*)) OR AB(assign* NEAR/5 (patient*)) OR AB(assign* NEAR/5 (intervention*)) OR AB(assign* NEAR/5 (case*)) OR AB(assign* NEAR/5 (subject*)) OR AB(assign* NEAR/5 (group*)) OR AB(assign* NEAR/5 (patient*)) OR AB(assign* NEAR/5 (intervention*))                                                                                                                                                                                                                                                                                                                                                                                                                                                                                                                                                                                        | 102   |
| S35 | TI(intervention NEAR/5 (case*)) OR TI(intervention NEAR/5 (subject*)) OR TI(intervention NEAR/5 (group*)) OR TI(intervention NEAR/5 (patient*)) OR AB(intervention NEAR/5 (case*)) OR AB(intervention NEAR/5 (subject*)) OR AB(intervention NEAR/5 (group*)) OR AB(intervention NEAR/5 (patient*))                                                                                                                                                                                                                                                                                                                                                                                                                                                                                                                                                                                                                            | 46    |

|     |                                                                                                                                                                                                                                                                                                                                                                                       |       |
|-----|---------------------------------------------------------------------------------------------------------------------------------------------------------------------------------------------------------------------------------------------------------------------------------------------------------------------------------------------------------------------------------------|-------|
| S36 | TI(experiment* NEAR/5 (case*)) OR TI(experiment* NEAR/5 (subject*)) OR TI(experiment* NEAR/5 (group*)) OR TI(experiment* NEAR/5 (patient*)) OR (experiment* NEAR/5 (intervention)) OR AB(experiment* NEAR/5 (case*)) OR AB(experiment* NEAR/5 (subject*)) OR AB(experiment* NEAR/5 (group*)) OR AB(experiment* NEAR/5 (patient*)) OR AB(experiment* NEAR/5 (intervention*))           | 314   |
| S37 | TI(treatment NEAR/5 (case)) OR TI(treatment NEAR/5 (subject*)) OR TI(treatment NEAR/5 (group*)) OR TI(treatment NEAR/5 (patient*)) OR TI(treatment NEAR/5 (intervention)) OR AB(treatment NEAR/5 (case)) OR AB(treatment NEAR/5 (subject*)) OR AB(treatment NEAR/5 (group*)) OR AB(treatment NEAR/5 (patient*)) OR AB(treatment NEAR/5 (intervention))                                | 87    |
| S38 | TI(control NEAR/5 (case)) OR TI(control NEAR/5 (subject*)) OR TI(control NEAR/5 (group*)) OR TI(control NEAR/5 (patient*)) OR TI(control NEAR/5 (intervention)) OR AB(control NEAR/5 (case)) OR AB(control NEAR/5 (subject*)) OR AB(control NEAR/5 (group*)) OR AB(control NEAR/5 (patient*)) OR AB(control NEAR/5 (intervention))                                                    | 256   |
| S39 | (TI(regression NEAR/1 (discontinuity)) OR TI(difference-in-difference*) OR TI(event NEAR/1 stud*) OR TI (interrupted time serie*) OR TI(instrumental variable*) OR TI(waitlist control*)) OR (AB(regression NEAR/1 (discontinuity)) OR AB(difference-in-difference*) OR AB(event NEAR/1 stud*) OR AB(interrupted time serie*) OR AB(instrumental variable*) OR AB(waitlist control*)) | 27    |
| S40 | S18 OR S19 OR S20 OR S21 OR S22 OR S23 OR S24 OR S25 OR S26 OR S27 OR S28 OR S29 OR S30 OR S31 OR S32 OR S33 OR S34 OR S35 OR S36 OR S37 OR S38 OR S39                                                                                                                                                                                                                                | 13382 |
| S41 | S17 AND S40                                                                                                                                                                                                                                                                                                                                                                           | 97    |

## Australian Education Index

Searched through ProQuest interface. Searched 01/03/2016. Limiters - Date Published: 01/01/1980 - 2016/01/03.

| Search | Search Terms                                                                                                                                                                                                                                                                                                                                                                                                                                                                                                                                                         | Results |
|--------|----------------------------------------------------------------------------------------------------------------------------------------------------------------------------------------------------------------------------------------------------------------------------------------------------------------------------------------------------------------------------------------------------------------------------------------------------------------------------------------------------------------------------------------------------------------------|---------|
| 1      | TI:(school* OR primary school* OR elementary school* OR secondary school* OR high school* OR middle school* OR student* OR pupil* OR child* OR lowachiev* OR underachiev* OR disab*) AND TI:(performance* OR academic* OR achieve* OR abilit* OR learn* OR outcome* OR intell* OR read* OR literac* OR math* OR develop* OR numerac* OR langua*) AND TI:(random* OR placebo OR RCT* OR trial* OR group* OR quasi-experiment* OR cohort* OR case* intervent* OR experiment* OR study* OR evaluat* OR treatment* OR longitudinal* OR evidence* OR best* OR effective*) | 398     |
| 2      | SU:(perform* OR academic* OR achieve* OR abilit* OR learn* OR outcome* OR intell* OR read* OR literac* OR math* OR develop* OR numerac* OR langua*)                                                                                                                                                                                                                                                                                                                                                                                                                  | 509     |
| 3      | 1 AND 2                                                                                                                                                                                                                                                                                                                                                                                                                                                                                                                                                              | 85      |

## Science Citation Index & Social Science Citation Index

Indexes=SCI-EXPANDED, SSCI Timespan=2016-2018. Searched 29/6 – 2018.

|      |           |                                                                                                                                                                                                                                                                                                                                                                                                                                                                                                                                                                                                                                                                                                            |
|------|-----------|------------------------------------------------------------------------------------------------------------------------------------------------------------------------------------------------------------------------------------------------------------------------------------------------------------------------------------------------------------------------------------------------------------------------------------------------------------------------------------------------------------------------------------------------------------------------------------------------------------------------------------------------------------------------------------------------------------|
| # 55 | 907       | #54 AND #25                                                                                                                                                                                                                                                                                                                                                                                                                                                                                                                                                                                                                                                                                                |
| # 54 | 1,794,160 | #53 OR #52 OR #51 OR #50 OR #49 OR #48 OR #47 OR #46 OR #45 OR #44 OR #43 OR #42 OR #41 OR #40 OR #39 OR #38 OR #37 OR #36 OR #35 OR #34 OR #33 OR #32 OR #31 OR #30 OR #29 OR #28 OR #27 OR #26                                                                                                                                                                                                                                                                                                                                                                                                                                                                                                           |
| # 53 | 8,096     | (TS=(regression NEAR/1 (discontinuity)) OR TS=(difference-in-difference*) OR TS=(event NEAR/1 stud*) OR TS=(interrupted time serie*) OR TS=(instrumental variable*) OR TS=(waitlist control*))                                                                                                                                                                                                                                                                                                                                                                                                                                                                                                             |
| # 52 | 8,096     | ((TI=(regression NEAR/1 (discontinuity)) OR TI=(difference-in-difference*) OR TI=(event NEAR/1 stud*) OR TI=(interrupted time serie*) OR TI=(instrumental variable*) OR TI=(waitlist control*)) OR (TS=(regression NEAR/1 (discontinuity)) OR TS=(difference-in-difference*) OR TS=(event NEAR/1 stud*) OR TS=(interrupted time serie*) OR TS=(instrumental variable*) OR TS=(waitlist control*)))                                                                                                                                                                                                                                                                                                         |
| # 51 | 145,391   | (TI=(control NEAR/5 (case)) OR TI=(control NEAR/5 (subject*)) OR TI=(control NEAR/5 (group*)) OR TI=(control NEAR/5 (patient*)) OR TI=(control NEAR/5 (intervention)) OR TS=(control NEAR/5 (case)) OR TS=(control NEAR/5 (subject*)) OR TS=(control NEAR/5 (group*)) OR TS=(control NEAR/5 (patient*)) OR TS=(control NEAR/5 (intervention)))                                                                                                                                                                                                                                                                                                                                                             |
| # 50 | 113,967   | (TI=(treatment NEAR/5 (case)) OR TI=(treatment NEAR/5 (subject*)) OR TI=(treatment NEAR/5 (group*)) OR TI=(treatment NEAR/5 (patient*)) OR TI=(treatment NEAR/5 (intervention*)) OR TS=(treatment NEAR/5 (case)) OR TS=(treatment NEAR/5 (subject*)) OR TS=(treatment NEAR/5 (group*)) OR TS=(treatment NEAR/5 (patient*)) OR TS=(treatment NEAR/5 (intervention*)))                                                                                                                                                                                                                                                                                                                                       |
| # 49 | 23,187    | (TI=(experiment* NEAR/5 (case*)) OR TI=(experiment* NEAR/5 (subject*)) OR TI=(experiment* NEAR/5 (group*)) OR TI=(experiment* NEAR/5 (patient*)) OR TI=(experiment* NEAR/5 (intervention*)) OR TS=(experiment* NEAR/5 (case*)) OR TS=(experiment* NEAR/5 (subject*)) OR TS=(experiment* NEAR/5 (group*)) OR TS=(experiment* NEAR/5 (patient*)) OR TS=(experiment* NEAR/5 (intervention*)))                                                                                                                                                                                                                                                                                                                 |
| # 48 | 29,075    | (TI=(intervention NEAR/5 (case*)) OR TI=(intervention NEAR/5 (subject*)) OR TI=(intervention NEAR/5 (group*)) OR TI=(intervention NEAR/5 (patient*)) OR TS=(intervention NEAR/5 (case*)) OR TS=(intervention NEAR/5 (subject*)) OR TS=(intervention NEAR/5 (group*)) OR TS=(intervention NEAR/5 (patient*)))                                                                                                                                                                                                                                                                                                                                                                                               |
| # 47 | 15,431    | ((TS=(assign* NEAR/5 (case*)) OR TS=(assign* NEAR/5 (subject*)) OR TS=(assign* NEAR/5 (group*)) OR TS=(assign* NEAR/5 (patient*)) OR TS=(assign* NEAR/5 (intervention*)) OR TS=(assign* NEAR/5 (case*)) OR TS=(assign* NEAR/5 (subject*)) OR TS=(assign* NEAR/5 (group*)) OR TS=(assign* NEAR/5 (patient*)) OR TS=(assign* NEAR/5 (intervention*))) OR (TI=(assign* NEAR/5 (case*)) OR TI=(assign* NEAR/5 (subject*)) OR TI=(assign* NEAR/5 (group*)) OR TI=(assign* NEAR/5 (patient*)) OR TI=(assign* NEAR/5 (intervention*)) OR TI=(assign* NEAR/5 (case*)) OR TI=(assign* NEAR/5 (subject*)) OR TI=(assign* NEAR/5 (group*)) OR TI=(assign* NEAR/5 (patient*)) OR TI=(assign* NEAR/5 (intervention*)))) |
| # 46 | 565,907   | (TI=((quasi-experiment* OR quasiexperiment* OR Propensity score* OR (compar* NEAR/1 (group*))) OR (match* NEAR/1 (control*)) OR (match* NEAR/1 (group*)) OR (match* NEAR/1 (compar*)) OR (experiment* trial* OR experiment* design* OR experiment* method* OR experiment* stud* OR experiment* evaluation* OR experiment* test* OR experiment* assessment*                                                                                                                                                                                                                                                                                                                                                 |

|      |                |                                                                                                                                                                                                                                                                                                                                                                                                                                                                                                                                                                         |
|------|----------------|-------------------------------------------------------------------------------------------------------------------------------------------------------------------------------------------------------------------------------------------------------------------------------------------------------------------------------------------------------------------------------------------------------------------------------------------------------------------------------------------------------------------------------------------------------------------------|
|      |                | OR assessment only OR (comparison NEAR/1 (samp*)) OR propensity match* OR (Between NEAR/1 (group*)) OR TS=((quasi-experiment* OR quasiexperiment* OR Propensity score* OR (compar* NEAR/1 (group*)) OR (match* NEAR/1 (control*)) OR (match* NEAR/1 (group*)) OR (match* NEAR/1 (compar*)) OR (experiment* trial* OR experiment* design* OR experiment* method* OR experiment* stud* OR experiment* evaluation* OR experiment* test* OR experiment* assessment* OR assessment only OR (comparison NEAR/1 (samp*)) OR propensity match* OR (Between NEAR/1 (group*)))))) |
| # 45 | <u>108.956</u> | (TI=((random* NEAR/2 (trial* OR RCT))) OR TS=((random* NEAR/2 (trial* OR RCT))))                                                                                                                                                                                                                                                                                                                                                                                                                                                                                        |
| # 44 | <u>4.062</u>   | (TI=((Non-random* OR nonradom* OR (non NEAR/1 random*))) OR TS=((Non-random* OR nonradom* OR (non NEAR/1 random*))))                                                                                                                                                                                                                                                                                                                                                                                                                                                    |
| # 43 | <u>3.854</u>   | (TI=((propensity score* OR match* NEAR/1 (control*)) OR (match* NEAR/1 (compar*))) OR (assessment only OR comparison samp* OR propensity match*))                                                                                                                                                                                                                                                                                                                                                                                                                       |
| # 42 | <u>5.003</u>   | (TI=(assign* NEAR/3 (subject* OR patient*)) OR TS=(assign* NEAR/3 (subject* OR patient*)))                                                                                                                                                                                                                                                                                                                                                                                                                                                                              |
| # 41 | <u>576.844</u> | ((TI=(quasi-experiment* OR quasiexperiment* OR experiment*) OR TS=(quasi-experiment* OR quasiexperiment* OR experiment*))                                                                                                                                                                                                                                                                                                                                                                                                                                               |
| # 40 | <u>7.598</u>   | (TI=(Intervention* NEAR/1 stud*) OR TS=(Intervention* NEAR/1 stud*))                                                                                                                                                                                                                                                                                                                                                                                                                                                                                                    |
| # 39 | <u>85.921</u>  | (TI=(retrospective) OR TS=(retrospective))                                                                                                                                                                                                                                                                                                                                                                                                                                                                                                                              |
| # 38 | <u>47.061</u>  | (TI=(prospective NEAR/2 stud*) OR TS=(prospective NEAR/2 stud*))                                                                                                                                                                                                                                                                                                                                                                                                                                                                                                        |
| # 37 | <u>41.780</u>  | (TI=(observational) OR TS=(observational))                                                                                                                                                                                                                                                                                                                                                                                                                                                                                                                              |
| # 36 | <u>59.575</u>  | (TS=(longitudinal) OR TI=(longitudinal))                                                                                                                                                                                                                                                                                                                                                                                                                                                                                                                                |
| # 35 | <u>111</u>     | (TS=(followup NEAR/2 stud*) OR TI=(followup NEAR/2 stud*))                                                                                                                                                                                                                                                                                                                                                                                                                                                                                                              |
| # 34 | <u>9.238</u>   | (TI=(epidemiologic* NEAR/2 stud*) OR TS=(epidemiologic* NEAR/2 stud*))                                                                                                                                                                                                                                                                                                                                                                                                                                                                                                  |
| # 33 | <u>63.729</u>  | (TI=("cross sectional") OR TS=(cross sectional*))                                                                                                                                                                                                                                                                                                                                                                                                                                                                                                                       |
| # 32 | <u>82.834</u>  | (TI=("case control") OR TS=(case control*))                                                                                                                                                                                                                                                                                                                                                                                                                                                                                                                             |
| # 31 | <u>265.582</u> | (TS=(case stud*) OR TI=(case stud*))                                                                                                                                                                                                                                                                                                                                                                                                                                                                                                                                    |
| # 30 | <u>137.308</u> | (TS=(cohort*) OR TI=(cohort*))                                                                                                                                                                                                                                                                                                                                                                                                                                                                                                                                          |
| # 29 | <u>577.738</u> | (TS=(group*) OR TI=(group*))                                                                                                                                                                                                                                                                                                                                                                                                                                                                                                                                            |
| # 28 | <u>253.654</u> | (TS=(trial*) OR TI=(trial*))                                                                                                                                                                                                                                                                                                                                                                                                                                                                                                                                            |
| # 27 | <u>30.786</u>  | (TS=(placebo) OR TI=(placebo))                                                                                                                                                                                                                                                                                                                                                                                                                                                                                                                                          |
| # 26 | <u>259.337</u> | (TS=(random*) OR TI=(random*))                                                                                                                                                                                                                                                                                                                                                                                                                                                                                                                                          |
| # 25 | <u>1.604</u>   | (#24 AND #23 AND #22)                                                                                                                                                                                                                                                                                                                                                                                                                                                                                                                                                   |
| # 24 | <u>153.311</u> | (#21 OR #20 OR #19 OR #18 OR #17)                                                                                                                                                                                                                                                                                                                                                                                                                                                                                                                                       |
| # 23 | <u>115.940</u> | (#16 OR #15 OR #14 OR #13 OR #12 OR #11 OR #10 OR #9)                                                                                                                                                                                                                                                                                                                                                                                                                                                                                                                   |
| # 22 | <u>26.219</u>  | (#8 OR #7 OR #6 OR #5 OR #4 OR #3 OR #2 OR #1)                                                                                                                                                                                                                                                                                                                                                                                                                                                                                                                          |
| # 21 | <u>439</u>     | ((TI=((transfer* NEAR/2 (effect*))))                                                                                                                                                                                                                                                                                                                                                                                                                                                                                                                                    |
| # 20 | <u>418</u>     | ((TS=("math* educat*"))                                                                                                                                                                                                                                                                                                                                                                                                                                                                                                                                                 |
| # 19 | <u>57.646</u>  | ((TS=("math*"))                                                                                                                                                                                                                                                                                                                                                                                                                                                                                                                                                         |

|      |         |                                                                                                                                                                                                                                                                                                                                                                                           |
|------|---------|-------------------------------------------------------------------------------------------------------------------------------------------------------------------------------------------------------------------------------------------------------------------------------------------------------------------------------------------------------------------------------------------|
| # 18 | 8,847   | ((TS=("literac*")))                                                                                                                                                                                                                                                                                                                                                                       |
| # 17 | 90,606  | ((TS=("read*")))                                                                                                                                                                                                                                                                                                                                                                          |
| # 16 | 351     | ((TI=((Intellect* NEAR/2 (develop*))))))                                                                                                                                                                                                                                                                                                                                                  |
| # 15 | 280     | ((TI=((school* NEAR/1 (performan* or achiev*))))))                                                                                                                                                                                                                                                                                                                                        |
| # 14 | 1,266   | ((TI=((academic* NEAR/2 (performance* or achiev* or abilit* or outcome*))))))                                                                                                                                                                                                                                                                                                             |
| # 13 | 709     | ((TI=((learn* NEAR/2 (disab* or problem*))))))                                                                                                                                                                                                                                                                                                                                            |
| # 12 | 1,676   | ((TS=("learn* disabilit*")))                                                                                                                                                                                                                                                                                                                                                              |
| # 11 | 112,722 | ((TS=("learn*")))                                                                                                                                                                                                                                                                                                                                                                         |
| # 10 | 11      | ((TS=("academic* achieve* gap*")))                                                                                                                                                                                                                                                                                                                                                        |
| # 9  | 3,093   | ((TS=("academic* achieve*")))                                                                                                                                                                                                                                                                                                                                                             |
| # 8  | 23,853  | ((TI=((Student* OR pupil* NEAR/3 (Learn*) NEAR/2 (disab* OR problem*))))))                                                                                                                                                                                                                                                                                                                |
| # 7  | 3,385   | ((TI=((Primary NEAR/1 (School)) NEAR/3 (Student* OR pupil*)) OR ((Elementary NEAR/1 (School)) NEAR/3 (Student* OR pupil*)) OR ((Secondary NEAR/1 (school*)) OR (high NEAR/2 (school*)) OR (middle NEAR/2 (School*)) NEAR/3 (student* OR pupil*))))))                                                                                                                                      |
| # 6  | 780     | ((TI=((Underachiev* OR Under NEAR/1 (achiev* OR lowachiev*)) OR (low NEAR/2 (achiev*)) OR (Low NEAR/1 (perform* OR lowperform*)) OR ((at-risk OR "at" NEAR/1 (risk)) NEAR/1 (student* OR pupil*)) OR ((high-risk OR high NEAR/1 (risk)) NEAR/1 (student* OR pupil*)) OR ((Special NEAR/1 (Need*)) NEAR/1 (Student* OR pupil*)) OR ((Low NEAR/1 (income)) NEAR/1 (student* OR pupil*)))))) |
| # 5  | 23,853  | ((TI=((Student* OR pupil* NEAR/3 (Learn*) NEAR/2 (disab* or problem*))))))                                                                                                                                                                                                                                                                                                                |
| # 4  | 117     | ((TI=((("Foster Care*") AND child*)))                                                                                                                                                                                                                                                                                                                                                     |
| # 3  | 0       | ((TI=((Child* NEAR/2 (placed) NEAR/1 (care))))))                                                                                                                                                                                                                                                                                                                                          |
| # 2  | 3,385   | ((TI=((Primary NEAR/1 (School)) NEAR/3 (Student* or pupil*)) OR ((Elementary NEAR/1 (School)) NEAR/3 (Student* or pupil*)) OR ((Secondary NEAR/1 (school*)) OR (high NEAR/2 (school*)) OR (middle NEAR/2 (School*)) NEAR/3 (student* OR pupil*))))))                                                                                                                                      |
| # 1  | 780     | ((TI=((Underachiev* OR Under NEAR/1 (achiev* or lowachiev*)) OR (low NEAR/2 (achiev*)) OR (Low NEAR/1 (perform* OR lowperform*)) OR ((at-risk OR "at" NEAR/1 (risk)) NEAR/1 (student* or pupil*)) OR ((high-risk or high NEAR/1 (risk)) NEAR/1 (student* or pupil*)) OR ((Special NEAR/1 (Need*)) NEAR/1 (Student* or pupil*)) OR ((Low NEAR/1 (income)) NEAR/1 (student* or pupil*)))))) |

## Medline & Embase

Searched through OVID-host. Searched 04/03/2016. Search limited from 1980-2016.

| Search Query |                                                                                                                            | Results |
|--------------|----------------------------------------------------------------------------------------------------------------------------|---------|
| 57           | 34 and 56                                                                                                                  | 323     |
| 56           | 35 OR 36 OR 37 OR 38 OR 39 OR 40 OR 41 OR 42 OR 43 OR 44 OR 45 OR 46 OR 47 OR 48 OR 49 OR 50 OR 51 OR 52 OR 53 OR 54 OR 55 | 5063720 |

| Search | Query                                                                                                                                                                                                                                                                                                                                                                                                                                                                                                                                                                                                                                                                                                                                                                                                                                                                        | Results |
|--------|------------------------------------------------------------------------------------------------------------------------------------------------------------------------------------------------------------------------------------------------------------------------------------------------------------------------------------------------------------------------------------------------------------------------------------------------------------------------------------------------------------------------------------------------------------------------------------------------------------------------------------------------------------------------------------------------------------------------------------------------------------------------------------------------------------------------------------------------------------------------------|---------|
| 55     | (((regression adj1 discontinuity) OR difference-in-difference* OR event) adj1 stud*) OR interrupted time serie* OR instrumental variable* OR waitlist control*).ti. OR (((regression adj1 discontinuity) OR difference-in-difference* OR event) adj1 stud*) OR interrupted time serie* OR instrumental variable* OR waitlist control*).ab.                                                                                                                                                                                                                                                                                                                                                                                                                                                                                                                                   | 2881    |
| 54     | ((control adj5 case) OR (control adj5 subject*) OR (control adj5 group*) OR (control adj5 patient*) OR (control adj5 intervention)).ti. OR ((control adj5 case) OR (control adj5 subject*) OR (control adj5 group*) OR (control adj5 patient*) OR (control adj5 intervention)).ab.                                                                                                                                                                                                                                                                                                                                                                                                                                                                                                                                                                                           | 550849  |
| 53     | ((treatment adj5 case) OR (treatment adj5 subject*) OR (treatment adj5 group*) OR (treatment adj5 patient*) OR (treatment adj5 intervention)).ti. OR ((treatment adj5 case) OR (treatment adj5 subject*) OR (treatment adj5 group*) OR (treatment adj5 patient*) OR (treatment adj5 intervention)).ab.                                                                                                                                                                                                                                                                                                                                                                                                                                                                                                                                                                       | 523471  |
| 52     | ((experiment* adj5 case) OR (experiment* adj5 subject*) OR (experiment* adj5 group*) OR (experiment* adj5 patient*) OR (experiment* adj5 intervention)).ti. OR ((experiment* adj5 case) OR (experiment* adj5 subject*) OR (experiment* adj5 group*) OR (experiment* adj5 patient*) OR (experiment* adj5 intervention)).ab.                                                                                                                                                                                                                                                                                                                                                                                                                                                                                                                                                   | 79366   |
| 51     | ((intervention adj5 case) OR (intervention adj5 subject*) OR (intervention adj5 group*) OR (intervention adj5 patient*)).ti. OR ((intervention adj5 case) OR (intervention adj5 subject*) OR (intervention adj5 group*) OR (intervention adj5 patient*)).ab.                                                                                                                                                                                                                                                                                                                                                                                                                                                                                                                                                                                                                 | 65864   |
| 50     | ((assign* adj5 case) OR (assign* adj5 subject*) OR (assign* adj5 group*) OR (assign* adj5 patient*) OR (assign* adj5 intervention)).ti. OR ((assign* adj5 case) OR (assign* adj5 subject*) OR (assign* adj5 group*) OR (assign* adj5 patient*) OR (assign* adj5 intervention)).ab.                                                                                                                                                                                                                                                                                                                                                                                                                                                                                                                                                                                           | 62637   |
| 49     | (quasi-experiment* OR quasiexperiment* OR Propensity score* OR (compar* adj1 group*) OR (match* adj1 control*) OR (match* adj1 group*) OR (match* adj1 compar*) OR experiment* trial* OR experiment* design* OR experiment* method* OR experiment* stud* OR experiment* evaluation* OR experiment* test* OR experiment* assessment* OR assessment only OR (comparison adj1 samp*) OR propensity match* OR (Between adj1 group*)).ti. OR (quasi-experiment* OR quasiexperiment* OR Propensity score* OR (compar* adj1 group*) OR (match* adj1 control*) OR (match* adj1 group*) OR (match* adj1 compar*) OR experiment* trial* OR experiment* design* OR experiment* method* OR experiment* stud* OR experiment* evaluation* OR experiment* test* OR experiment* assessment* OR assessment only OR (comparison adj1 samp*) OR propensity match* OR (Between adj1 group*)).ab. | 338123  |
| 48     | ((random* adj2 trial*) OR RCT).ti. OR ((random* adj2 trial*) OR RCT).ab.                                                                                                                                                                                                                                                                                                                                                                                                                                                                                                                                                                                                                                                                                                                                                                                                     | 176530  |
| 47     | (Non-random* OR nonradom* OR (non adj1 random*)).ti. OR (Non-random* OR nonradom* OR (non adj1 random*)).ab.                                                                                                                                                                                                                                                                                                                                                                                                                                                                                                                                                                                                                                                                                                                                                                 | 11689   |
| 46     | (Propensity score* OR (match* adj1 control*) OR (match* adj1 compar*) OR assessment only OR comparison samp* OR propensity match*).ti. OR (Propensity score* OR (match* adj1 control*) OR (match* adj1 compar*) OR assessment only OR comparison samp* OR propensity match*).ab.                                                                                                                                                                                                                                                                                                                                                                                                                                                                                                                                                                                             | 74039   |
| 45     | (assign adj3 (subject* OR patient*)).ti. OR (assign adj3 (subject* OR patient*)).ab.                                                                                                                                                                                                                                                                                                                                                                                                                                                                                                                                                                                                                                                                                                                                                                                         | 447     |
| 44     | (quasi-experiment* OR quasiexperiment* OR experiment*).ti. OR (quasi-experiment* OR quasiexperiment* OR experiment*).ab.                                                                                                                                                                                                                                                                                                                                                                                                                                                                                                                                                                                                                                                                                                                                                     | 1357128 |
| 43     | (intervention* adj1 stud*).ti. OR (intervention* adj1 stud*).ab.                                                                                                                                                                                                                                                                                                                                                                                                                                                                                                                                                                                                                                                                                                                                                                                                             | 16512   |
| 42     | retrospective.ti. OR retrospective.ab.                                                                                                                                                                                                                                                                                                                                                                                                                                                                                                                                                                                                                                                                                                                                                                                                                                       | 288643  |
| 41     | (prospective adj2 stud*).ti. OR (prospective adj2 stud*).ab.                                                                                                                                                                                                                                                                                                                                                                                                                                                                                                                                                                                                                                                                                                                                                                                                                 | 193506  |
| 40     | longitudinal.ti. OR longitudinal.ab. OR observational.ti. OR observational.ab.                                                                                                                                                                                                                                                                                                                                                                                                                                                                                                                                                                                                                                                                                                                                                                                               | 218571  |

| Search Query                                                                                                                                                                                                                                                                                                                                                               | Results |
|----------------------------------------------------------------------------------------------------------------------------------------------------------------------------------------------------------------------------------------------------------------------------------------------------------------------------------------------------------------------------|---------|
| 39 ((epidemiologic adj2 study).ti. OR epidemiologic.mp.) adj2 study.ab.) OR ((followup OR follow up) adj2 stud*).ti. OR ((followup OR follow up) adj2 stud*).ab. [mp=title, abstract, original title, name of substance word, subject heading word, keyword heading word, protocol supplementary concept word, rare disease supplementary concept word, unique identifier] | 45099   |
| 38 cross sectional.ti. OR cross sectional.ab.                                                                                                                                                                                                                                                                                                                              | 175279  |
| 37 (case control OR cohort).ti. OR case control.ab. OR cohort.ab.                                                                                                                                                                                                                                                                                                          | 334639  |
| 36 (cohort analysis OR case studies).hw,kf,ui.                                                                                                                                                                                                                                                                                                                             | 13018   |
| 35 (randomized OR placebo OR (randomly OR trial*) OR group*).ab.                                                                                                                                                                                                                                                                                                           | 2929343 |
| 34 16 and 27 and 33                                                                                                                                                                                                                                                                                                                                                        | 787     |
| 33 28 OR 29 OR 30 OR 31 OR 32                                                                                                                                                                                                                                                                                                                                              | 107384  |
| 32 (transfer adj2 effect*).af.                                                                                                                                                                                                                                                                                                                                             | 2559    |
| 31 ((numerac* OR math*) adj1 learn*).af.                                                                                                                                                                                                                                                                                                                                   | 1233    |
| 30 Literacy.hw,kf,ui.                                                                                                                                                                                                                                                                                                                                                      | 4390    |
| 29 Reading.hw,kf,ui.                                                                                                                                                                                                                                                                                                                                                       | 43205   |
| 28 Language.hw,kf,ui.                                                                                                                                                                                                                                                                                                                                                      | 60377   |
| 27 17 OR 18 OR 19 OR 20 OR 21 OR 22 OR 23 OR 24 OR 25 OR 26                                                                                                                                                                                                                                                                                                                | 328504  |
| 26 (intellect adj2 develop*).af.                                                                                                                                                                                                                                                                                                                                           | 13      |
| 25 (school* adj1 (performan* OR achiev*)).af.                                                                                                                                                                                                                                                                                                                              | 4038    |
| 24 (academic adj2 (performanc* OR achiev* OR abilit* OR outcome*)).af.                                                                                                                                                                                                                                                                                                     | 6288    |
| 23 (learn* adj2 (disab* OR problem*)).af.                                                                                                                                                                                                                                                                                                                                  | 18651   |
| 22 Intelligence.hw,kf,ui.                                                                                                                                                                                                                                                                                                                                                  | 52794   |
| 21 Learning.hw,kf,ui.                                                                                                                                                                                                                                                                                                                                                      | 141813  |
| 20 Learning Disorders.hw,kf,ui.                                                                                                                                                                                                                                                                                                                                            | 13014   |
| 19 Students.hw,kf,ui.                                                                                                                                                                                                                                                                                                                                                      | 91367   |
| 18 Child Development.hw,kf,ui.                                                                                                                                                                                                                                                                                                                                             | 43742   |
| 17 achievement.hw,kf,ui.                                                                                                                                                                                                                                                                                                                                                   | 13876   |
| 16 9 OR 10 OR 11 OR 12 OR 13 OR 14 OR 15                                                                                                                                                                                                                                                                                                                                   | 100681  |
| 15 ((student* OR pupil*) adj3 (learn adj2 (disab* OR problem*))).af.                                                                                                                                                                                                                                                                                                       | 9       |
| 14 foster home care.hw. and child*.af.                                                                                                                                                                                                                                                                                                                                     | 2738    |
| 13 (((secondary adj1 school*) OR (high adj2 school) OR (middle adj1 school)) adj3 (student* OR pupil*)).af.                                                                                                                                                                                                                                                                | 7980    |
| 12 school*.hw.                                                                                                                                                                                                                                                                                                                                                             | 86001   |
| 11 (elementary adj1 school* adj3 (student* OR pupil*)).af.                                                                                                                                                                                                                                                                                                                 | 835     |
| 10 (primary adj1 school* adj3 (student* OR pupil*)).af.                                                                                                                                                                                                                                                                                                                    | 697     |
| 9 1 OR 2 OR 3 OR 4 OR 5 OR 6 OR 7 OR 8                                                                                                                                                                                                                                                                                                                                     | 5336    |
| 8 (low adj1 income adj1 (student* OR pupil*)).af.                                                                                                                                                                                                                                                                                                                          | 59      |
| 7 (special adj1 need* adj1 (student* OR pupil*)).af.                                                                                                                                                                                                                                                                                                                       | 25      |
| 6 ((high-risk OR high) adj1 risk adj1 (student* OR pupil*)).af.                                                                                                                                                                                                                                                                                                            | 105     |

| Search | Query                                                    | Results |
|--------|----------------------------------------------------------|---------|
| 5      | ((at-risk OR at) adj1 risk adj1 (student* OR pupil*).af. | 424     |
| 4      | (low adj1 perform*).af.                                  | 1507    |
| 3      | (low adj1 achiev*).af.                                   | 948     |
| 2      | (under adj1 achiev*).af.                                 | 1500    |
| 1      | (underachiev* OR lowachieve* OR lowperform).af.          | 845     |

---

## SEARCHES ON OTHER RESOURCES

---

### DIVA

<https://www.diva-portal.org/smash/search.jsf?dswid=-7369>

Searches were performed in the “Advanced Search – Research publications” fields. We used a combination of terms in the three search facets below:

1. school\*, primary school\*, elementary school\*, secondary school\*, high school\*, middle school\*, student\*, pupil\*, child\*, lowachiev\*, underachiev\*
2. performance\*, academic\*, achieve\*, abilit\*, learn\*, outcome\*, intell\*, read\*, literac\*, math\*, develop\*, numerac\*
3. random\*, placebo, RCT\*, trial\*, group\*, quasi-experiment\*, cohort\*, case\* intervent\*, experiment\*, study\*, evaluat\*, treatment\*, longitudinal\*

The original searches were performed in March 2016 and yielded 597 results. The searches were limited to 1980-2016. The updated searches in September 2018 yielded 102 new results.

### CRISTIN

<https://app.cristin.no/>

Searches were performed in the search field on the main page. Our searches combined terms from the two facets below:

1. school\*, primary school\*, elementary school\*, secondary school\*, high school\*, middle school\*, student\*, pupil\*, child\*, lowachiev\*, underachiev\*
2. performance\*, academic\*, achieve\*, abilit\*, learn\*, outcome\*, intell\*, read\*, literac\*, math\*, develop\*, numerac\*
3. random\*, placebo, RCT\*, trial\*, group\*, quasi-experiment\*, cohort\*, case\* intervent\*, experiment\*, study\*, evaluat\*, treatment\*, longitudinal\*

The original searches were performed in March 2016 and yielded 180 results. The searches were limited to 1980-2016. The resource was not searched in the 2018 update to the maintenance and update of the search interface during the search period.

Since the searches were performed, the search interface of CRISTIN has been changed. The searches we performed might be hard to replicate in the current search interface.

### **Forskningsdatabasen**

<https://www.forskningsdatabasen.dk/>

Searches were performed in the “Publications” search field. We used a combination of terms in the three search facets below:

1. school\*, primary school\*, elementary school\*, secondary school\*, high school\*, middle school\*, student\*, pupil\*, child\*, lowachiev\*, underachiev\*
2. performance\*, academic\*, achieve\*, abilit\*, learn\*, outcome\*, intell\*, read\*, literac\*, math\*, develop\*, numerac\*
3. random\*, placebo, RCT\*, trial\*, group\*, quasi-experiment\*, cohort\*, case\* intervent\*, experiment\*, study\*, evaluat\*, treatment\*, longitudinal\*

The original searches were performed in March 2016 and yielded 109 results. The searches were limited to 1980-2016. The updated search in September 2018 yielded 6 new results.

### **Cochrane Library**

<https://www.cochranelibrary.com/>

Searches were performed in the “Record Title” search field. We used a combination of terms in the three search facets below:

1. school\*, primary school\*, elementary school\*, secondary school\*, high school\*, middle school\*, student\*, pupil\*, child\*, lowachiev\*, underachiev\*
2. performance\*, academic\*, achieve\*, abilit\*, learn\*, outcome\*, intell\*, read\*, literac\*, math\*, develop\*, numerac\*
3. random\*, placebo, RCT\*, trial\*, group\*, quasi-experiment\*, cohort\*, case\* intervent\*, experiment\*, study\*, evaluat\*, treatment\*, longitudinal\*

The original searches were performed in March 2016 and yielded 37 results. The searches were limited to 1980-2016. The updated searches in September 2018 yielded no new results.

### **Social Care Online**

<https://www.scie-socialcareonline.org.uk/User/login?ReturnUrl=%2fsearch%2fexpert>

Searches were performed in the “title” search field. We used a combination of terms in the three search facets below:

1. school\*, primary school\*, elementary school\*, secondary school\*, high school\*, middle school\*, student\*, pupil\*, child\*, lowachiev\*, underachiev\*
2. performance\*, academic\*, achieve\*, abilit\*, learn\*, outcome\*, intell\*, read\*, literac\*, math\*, develop\*, numerac\*
3. random\*, placebo, RCT\*, trial\*, group\*, quasi-experiment\*, cohort\*, case\* intervent\*, experiment\*, study\*, evaluat\*, treatment\*, longitudinal\*

The original searches were performed in March 2016 and yielded 204 results. The searches were limited to 1980-2016. The updated searches in September 2018 yielded 11 new results.

## Centre for Reviews and Dissemination (CRD)

<https://www.crd.york.ac.uk/CRDWeb/>

Search performed in “title” search field. We used a combination of terms in the three search facets below:

1. school\*, primary school\*, elementary school\*, secondary school\*, high school\*, middle school\*, student\*, pupil\*, child\*, lowachiev\*, underachiev\*
2. performance\*, academic\*, achieve\*, abilit\*, learn\*, outcome\*, intell\*, read\*, literac\*, math\*, develop\*, numerac\*
3. random\*, placebo, RCT\*, trial\*, group\*, quasi-experiment\*, cohort\*, case\* intervent\*, experiment\*, study\*, evaluat\*, treatment\*, longitudinal\*

The original searches were performed in March 2016 and yielded 62 results. The searches were limited to 1980-2016. The updated searches in September 2018 yielded 4 new results.

## What Works Clearinghouse - U.S. Department of Education (WWC)

<https://ies.ed.gov/ncee/wwc/>

The indexing structure of the publications on WWC is divided in topics that functions as filters. Each topic is divided into subsections. Individual studies are indexed as themes each subsections. We selected a range of topics relevant for this review, and screened the individual references indexed under each subsection. Below is an overview of the topics and subsections selected:

Topic: *Children and Youth with disabilities*

Subsection: *Peer-Assisted Learning Strategies, Read Naturally, Coping Power, Lindamood Phoneme Sequencing, First Steps to Success, Early Risers, Repeated Reading, Fast Track Elementary School, Reading Mastery, Project Read Phonology*

Topic: *English learners*

Subsection: *Peer Tutoring and Response Groups, Instructional Conversations and Literature Logs, Fast ForWord, Enhanced Proactive Reading, Bilingual Cooperative Integrated Reading and Composition, Vocabulary Improvement Program for English Language Learners and Their Classmates, Arthur, Read Well, Read Naturally*

Topic: *Literacy*

Subsection: *Sound Partners, Read 180, DaisyQuest, Accelerated Reader, SpellRead, Earobics, Cooperative Integrated Reading and Composition, Reading Recovery, Lexia Reading, Open Court Reading, Stepping Stones to Literacy, Student team reading and writing, Voyager Universal Literacy System, Corrective Reading, Start Making a Reader Today, Early Intervention in Reading, Reading Plus, Reading Apprenticeship, ClassWide Peer Tutoring, Little Books, Read, Write & Type, Failure Free Reading, Waterford Early Reading Program, Wilson Reading System, Reciprocal Teaching, SuccessMaker, LANGUAGE!*

Topic: *Mathematics*

Subsection: *Accelerated Math, I CAN Learn® Pre-Algebra and Algebra, DreamBox Learning, I CAN Learn*

Topic: *Behavior*

Subsection: *Positive Action, Lessons in Character*

Topic: *Path to Graduation*

Subsection: *Accelerated Middle Schools, High School Redirection, Check & Connect, Financial Incentives for Teen Parents to Stay in School, Achievement for Latinos through Academic Success (ALAS), Twelve Together, Quantum Opportunity Program, Project GRAD*

The original searches were performed in January 2017 and yielded 150 references. The updated searches in September 2018 identified no new references.

### **Danish Clearinghouse for Education Research**

<https://dpu.au.dk/en/research/publications/>

Search performed in “Publications” section search field. We used a combination of terms in the three search facets below:

1. school\*, primary school\*, elementary school\*, secondary school\*, high school\*, middle school\*, student\*, pupil\*, child\*, lowachiev\*, underachiev\*
2. performance\*, academic\*, achieve\*, abilit\*, learn\*, outcome\*, intell\*, read\*, literac\*, math\*, develop\*, numerac\*
3. random\*, placebo, RCT\*, trial\*, group\*, quasi-experiment\*, cohort\*, case\* intervent\*, experiment\*, study\*, evaluat\*, treatment\*, longitudinal\*

Terms were combined with the Danish term OG (=AND).

The original searches were performed in March 2016 and yielded 66 results. The searches were limited to 1982-2016 (no earlier limiter was possible). The updated searches in September 2018 yielded no new results.

### **The Institute for Education Sciences’ (IES) & American Economic Association’s RCT Registry**

Our protocol stated that we should search two trial registries: The Institute for Education Sciences’ (IES) Registry of Randomized Controlled Trials (<http://ies.ed.gov/ncee/wwc/references/registries/index.aspx>), and American Economic Association’s RCT Registry (<https://www.socialscienceregistry.org>). We were however unable to search the IES registry as it was not available (last tried July 23, 2018). We have asked IES about availability, but have to date not received a reply. We updated the search of American Economic Association’s RCT Registry on July 23, 2018.

---

## GREY LITERATURE SEARCHES

---

We performed a wide range of searches on the below institutional and governmental resources, academic clearinghouses and repositories for relevant academic theses, reports and conference/working papers. Most of the resources searched for grey literature include multiple types of references. The resources are listed under the category of literature most prevalent in the resource, even though multiple types of unpublished/published literature might be identified in the resource.

### Dissertations and Theses A&I

Searched through the ProQuest interface. Searched 02/03/2016. Search was limited from 1980-2016.

| Search    | Search                                                                                                                                                                                                                                                                                                                                                                                | Results   |
|-----------|---------------------------------------------------------------------------------------------------------------------------------------------------------------------------------------------------------------------------------------------------------------------------------------------------------------------------------------------------------------------------------------|-----------|
| Set#: S42 | S18 AND S41                                                                                                                                                                                                                                                                                                                                                                           | 786       |
| Set#: S41 | S19 OR S20 OR S21 OR S22 OR S23 OR S24 OR S25 OR S26 OR S27 OR S28 OR S29 OR S30 OR S31 OR S32 OR S33 OR S34 OR S35 OR S36 OR S37 OR S38 OR S39 OR S40                                                                                                                                                                                                                                | 2,082,703 |
| Set#: S40 | (TI(regression NEAR/1 (discontinuity)) OR TI(difference-in-difference*) OR TI(event NEAR/1 stud*) OR TI( interrupted time serie*) OR TI(instrumental variable*) OR TI(waitlist control*)) OR (AB(regression NEAR/1 (discontinuity)) OR AB(difference-in-difference*) OR AB(event NEAR/1 stud*) OR AB(interrupted time serie*) OR AB(instrumental variable*) OR AB(waitlist control*)) | 7,942     |
| Set#: S39 | TI(control NEAR/5 (case)) OR TI(control NEAR/5 (subject*)) OR TI(control NEAR/5 (group*)) OR TI(control NEAR/5 (patient*)) OR TI(control NEAR/5 (intervention)) OR AB(control NEAR/5 (case)) OR AB(control NEAR/5 (subject*)) OR AB(control NEAR/5 (group*)) OR AB(control NEAR/5 (patient*)) OR AB(control NEAR/5 (intervention))                                                    | 64,842    |
| Set#: S38 | TI(treatment NEAR/5 (case)) OR TI(treatment NEAR/5 (subject*)) OR TI(treatment NEAR/5 (group*)) OR TI(treatment NEAR/5 (patient*)) OR TI(treatment NEAR/5 (intervention)) OR AB(treatment NEAR/5 (case)) OR AB(treatment NEAR/5 (subject*)) OR AB(treatment NEAR/5 (group*)) OR AB(treatment NEAR/5 (patient*)) OR AB(treatment NEAR/5 (intervention))                                | 41,096    |
| Set#: S37 | TI(experiment* NEAR/5 (case*)) OR TI(experiment* NEAR/5 (subject*)) OR TI(experiment* NEAR/5 (group*)) OR TI(experiment* NEAR/5 (patient*)) OR (experiment* NEAR/5 (intervention)) OR AB(experiment* NEAR/5 (case*)) OR AB(experiment* NEAR/5 (subject*)) OR AB(experiment* NEAR/5 (group*)) OR AB(experiment* NEAR/5 (patient*)) OR AB(experiment* NEAR/5 (intervention*))           | 56901     |
| Set#: S36 | TI(intervention NEAR/5 (case*)) OR TI(intervention NEAR/5 (subject*)) OR TI(intervention NEAR/5 (group*)) OR TI(intervention NEAR/5 (patient*)) OR AB(intervention NEAR/5 (case*)) OR AB(intervention NEAR/5 (subject*)) OR AB(intervention NEAR/5 (group*)) OR AB(intervention NEAR/5 (patient*))                                                                                    | 12,588    |
| Set#: S35 | AB(assign* NEAR/5 (case*)) OR AB(assign* NEAR/5 (subject*)) OR AB(assign* NEAR/5 (group*)) OR AB(assign* NEAR/5 (patient*)) OR AB(assign* NEAR/5 (intervention*)) OR AB(assign* NEAR/5 (case*)) OR AB(assign* NEAR/5 (subject*)) OR AB(assign* NEAR/5 (group*)) OR AB(assign* NEAR/5 (patient*)) OR AB(assign* NEAR/5 (intervention*))                                                | 18,102    |

|           |                                                                                                                                                                                                                                                                                                                                                                                                                                                                                                                                                                                                                                                                                                                                                                                                                                                                                                                               |           |
|-----------|-------------------------------------------------------------------------------------------------------------------------------------------------------------------------------------------------------------------------------------------------------------------------------------------------------------------------------------------------------------------------------------------------------------------------------------------------------------------------------------------------------------------------------------------------------------------------------------------------------------------------------------------------------------------------------------------------------------------------------------------------------------------------------------------------------------------------------------------------------------------------------------------------------------------------------|-----------|
| Set#: S34 | TI(quasi-experiment* OR quasiexperiment* OR Propensity score* OR (compar* NEAR/1 (group*))) OR (match* NEAR/1 (control*)) OR (match* NEAR/1 (group*)) OR (match* NEAR/1 (compar*)) OR (experiment* trial* OR experiment* design* OR experiment* method* OR experiment* stud* OR experiment* evaluation* OR experiment* test* OR experiment* assessment* OR assessment only OR (comparison NEAR/1 (samp*))) OR propensity match* OR (Between NEAR/1 (group*)) OR AB(quasi-experiment* OR quasiexperiment* OR Propensity score* OR (compar* NEAR/1 (group*))) OR (match* NEAR/1 (control*)) OR (match* NEAR/1 (group*)) OR (match* NEAR/1 (compar*)) OR (experiment* trial* OR experiment* design* OR experiment* method* OR experiment* stud* OR experiment* evaluation* OR experiment* test* OR experiment*assessment* OR assessment only OR (comparison NEAR/1 (samp*))) OR (propensity match* OR (Between NEAR/1 (group*))) | 1,767,065 |
| Set#: S33 | TI(random* NEAR/2 (trial* OR RCT)) OR AB(random* NEAR/2 (trial* OR RCT))                                                                                                                                                                                                                                                                                                                                                                                                                                                                                                                                                                                                                                                                                                                                                                                                                                                      | 4,915     |
| Set#: S32 | TI(Non-random* OR nonradom* OR (non NEAR/1 random*)) OR AB(Non-random* OR Nonrandom* OR (non NEAR/1 random*))                                                                                                                                                                                                                                                                                                                                                                                                                                                                                                                                                                                                                                                                                                                                                                                                                 | 4,150     |
| Set#: S31 | TI(Propensity score* OR match* NEAR/1 (control*)) OR (match* NEAR/1 ( compar*)) OR (assessment only OR comparison samp* OR propensity match*) OR AB(Propensity score* OR (match* NEAR/1 control*)) OR (match* NEAR/1 compar*) OR (assessment only OR comparison samp* OR propensity match*)                                                                                                                                                                                                                                                                                                                                                                                                                                                                                                                                                                                                                                   | 1,437,399 |
| Set#: S30 | AB(assign* NEAR/3 (subject* OR patient*))                                                                                                                                                                                                                                                                                                                                                                                                                                                                                                                                                                                                                                                                                                                                                                                                                                                                                     | 5,488     |
| Set#: S29 | TI(assign* NEAR/3 (subject* OR patient*))                                                                                                                                                                                                                                                                                                                                                                                                                                                                                                                                                                                                                                                                                                                                                                                                                                                                                     | 22        |
| Set#: S28 | TI(quasi-experiment* OR quasiexperiment* OR experiment*) OR AB(quasi-experiment* OR quasiexperiment* OR experiment*)                                                                                                                                                                                                                                                                                                                                                                                                                                                                                                                                                                                                                                                                                                                                                                                                          | 473,696   |
| Set#: S27 | TI(Intervention* NEAR/1 Stud*) OR AB(Intervention* NEAR/1 Stud*)                                                                                                                                                                                                                                                                                                                                                                                                                                                                                                                                                                                                                                                                                                                                                                                                                                                              | 4,500     |
| Set#: S26 | (TI(prospective NEAR/2 study) OR AB(prospective NEAR/2 study) OR TI(retrospective) OR AB(retrospective))                                                                                                                                                                                                                                                                                                                                                                                                                                                                                                                                                                                                                                                                                                                                                                                                                      | 15,836    |
| Set#: S25 | TI(longitudinal) OR AB(longitudinal) OR TI(observational) OR AB(observational)                                                                                                                                                                                                                                                                                                                                                                                                                                                                                                                                                                                                                                                                                                                                                                                                                                                | 48,855    |
| Set#: S24 | TI(followup NEAR/2 study) OR AB(followup NEAR/2 study)                                                                                                                                                                                                                                                                                                                                                                                                                                                                                                                                                                                                                                                                                                                                                                                                                                                                        | 97        |
| Set#: S23 | TI(epidemiologic NEAR/2 study) OR AB(epidemiologic NEAR/2 study)                                                                                                                                                                                                                                                                                                                                                                                                                                                                                                                                                                                                                                                                                                                                                                                                                                                              | 1,434     |
| Set#: S22 | TI(cross sectional) OR AB(cross sectional)                                                                                                                                                                                                                                                                                                                                                                                                                                                                                                                                                                                                                                                                                                                                                                                                                                                                                    | 22,979    |
| Set#: S21 | TI(case control) OR AB(case control) OR TI(cohort) OR AB(cohort)                                                                                                                                                                                                                                                                                                                                                                                                                                                                                                                                                                                                                                                                                                                                                                                                                                                              | 64,539    |
| Set#: S20 | SU("Cohort") OR SU("case studies")                                                                                                                                                                                                                                                                                                                                                                                                                                                                                                                                                                                                                                                                                                                                                                                                                                                                                            | 2,078     |
| Set#: S19 | (AB(randomized) OR AB(placebo) OR AB(randomly) OR AB(trial) OR AB(groups))                                                                                                                                                                                                                                                                                                                                                                                                                                                                                                                                                                                                                                                                                                                                                                                                                                                    | 518,004   |
| Set#: S18 | S8 AND S13 AND                                                                                                                                                                                                                                                                                                                                                                                                                                                                                                                                                                                                                                                                                                                                                                                                                                                                                                                | 842       |
| Set#: S17 | S14 OR S15 OR S16                                                                                                                                                                                                                                                                                                                                                                                                                                                                                                                                                                                                                                                                                                                                                                                                                                                                                                             | 116,044   |
| Set#: S16 | TI((transfer* NEAR/2 (effect)))                                                                                                                                                                                                                                                                                                                                                                                                                                                                                                                                                                                                                                                                                                                                                                                                                                                                                               | 452       |
| Set#: S15 | SU("Mathematics") OR SU("Mathematics education")                                                                                                                                                                                                                                                                                                                                                                                                                                                                                                                                                                                                                                                                                                                                                                                                                                                                              | 94,310    |
| Set#: S14 | SU("Reading") OR SU("literacy")                                                                                                                                                                                                                                                                                                                                                                                                                                                                                                                                                                                                                                                                                                                                                                                                                                                                                               | 21,826    |
| Set#: S13 | S9 OR S10 OR S11 OR S12                                                                                                                                                                                                                                                                                                                                                                                                                                                                                                                                                                                                                                                                                                                                                                                                                                                                                                       | 16,182    |
| Set#: S12 | TI((Intellect* NEAR/2 (develop*)))                                                                                                                                                                                                                                                                                                                                                                                                                                                                                                                                                                                                                                                                                                                                                                                                                                                                                            | 378       |
| Set#: S11 | TI((School NEAR/1 (performan* OR achiev*)))                                                                                                                                                                                                                                                                                                                                                                                                                                                                                                                                                                                                                                                                                                                                                                                                                                                                                   | 1,702     |
| Set#: S10 | TI((Academic* NEAR/2 (performance* OR achiev* OR abilit* OR outcome*)))                                                                                                                                                                                                                                                                                                                                                                                                                                                                                                                                                                                                                                                                                                                                                                                                                                                       | 8,298     |
| Set#: S9  | TI((Learn* NEAR/2 (disab* OR Problem*)))                                                                                                                                                                                                                                                                                                                                                                                                                                                                                                                                                                                                                                                                                                                                                                                                                                                                                      | 6,112     |
| Set#: S8  | S6 OR S7                                                                                                                                                                                                                                                                                                                                                                                                                                                                                                                                                                                                                                                                                                                                                                                                                                                                                                                      | 164,850   |
| Set#: S7  | (SU("Academic Achievement") OR SU("academic achievement gaps") OR SU("Learning") OR SU("Learning Disabilities"))                                                                                                                                                                                                                                                                                                                                                                                                                                                                                                                                                                                                                                                                                                                                                                                                              | 34,380    |
| Set#: S6  | TI((Underachiev* OR Under NEAR/1 (achiev* OR lowachiev*)) OR (low NEAR/2 (achiev*)) OR (Low NEAR/1 (perform* OR lowperform*)) OR ((at-risk OR at NEAR/1 (risk)) NEAR/1 (student* OR pupil*)) OR ((high-risk OR high NEAR/1 (risk)) NEAR/1                                                                                                                                                                                                                                                                                                                                                                                                                                                                                                                                                                                                                                                                                     | 139,796   |

|          |                                                                                                                                                                                                                                                                                                                                                                                                                                                                                                                                                   |         |
|----------|---------------------------------------------------------------------------------------------------------------------------------------------------------------------------------------------------------------------------------------------------------------------------------------------------------------------------------------------------------------------------------------------------------------------------------------------------------------------------------------------------------------------------------------------------|---------|
|          | (student* OR pupil*) OR ((Special NEAR/1 (Need*)) NEAR/1 (Student* OR pupil*)) OR ((Low NEAR/1 (income)) NEAR/1 (student* OR pupil*)) OR ti(((Primary NEAR/1 (School)) NEAR/3 (Student* OR pupil*)) OR ((Elementary NEAR/1 (School)) NEAR/3 (Student* OR pupil*)) OR ((Secondary NEAR/1 (school*)) OR (high NEAR/2 (school*)) OR (middle NEAR/2 (School*)) NEAR/3 (student* OR pupil*)) OR ti((Child* NEAR/2 (placed) NEAR/1 (care))) OR ((SU("Foster Care")) AND child*) OR ti((Student* OR pupil* NEAR/3 (Learn*) NEAR/2 (disab* OR problem*))) |         |
| Set#: S5 | TI((Student* OR pupil* NEAR/3 (Learn*) NEAR/2 (disab* OR problem*)))                                                                                                                                                                                                                                                                                                                                                                                                                                                                              | 107,191 |
| Set#: S4 | ((SU("Foster Care")) AND child*)                                                                                                                                                                                                                                                                                                                                                                                                                                                                                                                  | 678     |
| Set#: S3 | TI((Child* NEAR/2 (placed) NEAR/1 (care)))                                                                                                                                                                                                                                                                                                                                                                                                                                                                                                        | 2       |
| Set#: S2 | TI(((Primary NEAR/1 (School)) NEAR/3 (Student* OR pupil*)) OR ((Elementary NEAR/1 (School)) NEAR/3 (Student* OR pupil*)) OR ((Secondary NEAR/1 (school*)) OR (high NEAR/2 (school*)) OR (middle NEAR/2 (School*)) NEAR/3 (student* OR pupil*)))                                                                                                                                                                                                                                                                                                   | 45,355  |
| Set#: S1 | TI((Underachiev* OR Under NEAR/1 (achiev* OR lowachiev*)) OR (low NEAR/2 (achiev*)) OR (Low NEAR/1 (perform* OR lowerperform*)) OR ((at-risk OR at NEAR/1 (risk)) NEAR/1 (student* OR pupil*)) OR ((high-risk OR high NEAR/1 (risk)) NEAR/1 (student* OR pupil*)) OR ((Special NEAR/1 (Need*)) NEAR/1 (Student* OR pupil*)) OR ((Low NEAR/1 (income)) NEAR/1 (student* OR pupil*)))                                                                                                                                                               | 3,766   |

## Theses Canada

<https://www.bac-lac.gc.ca/eng/services/theses/Pages/search.aspx>

Searches were performed in “Title keyword” or “Abstract keyword” search fields. We used a combination of terms in the two search facets below:

1. school\*, primary school\*, elementary school\*, secondary school\*, high school\*, middle school\*, student\*, pupil\*, child\*, lowachiev\*, underachiev\*
2. performance\*, academic\*, achieve\*, abilit\*, learn\*, outcome\*, intell\*, read\*, literac\*, math\*, develop\*, numerac\*

Original searches were performed January 2017 and yielded 145 results. The searches were limited to 1980-2017. The updated searches in September 2018 yielded 3 new results.

## European Educational Research Association

<https://eera-ecer.de/ecer-programmes/>

Searches were performed in the ECER programme search interface in the “title” search field.

Searches were limited to one conference at a time (limited by a search field), dating back to 1998.

We used a combination of terms in the two search facets below:

1. school\*, primary school\*, elementary school\*, secondary school\*, high school\*, middle school\*, student\*, pupil\*, child\*, lowachiev\*, underachiev\*
2. performance\*, academic\*, achieve\*, abilit\*, learn\*, outcome\*, intell\*, read\*, literac\*, math\*, develop\*, numerac\*

The original searches were performed in January 2017 and yielded 73 results. The original searches covered the ECER programmes from 1998-2016. The updated searches in September 2018 yielded 17 new results.

### **American Educational Research Association**

<https://www.aera.net/Publications/Online-Paper-Repository/AERA-Online-Paper-Repository>

Searches were performed in the AERA Online Paper Repository. We used a combination of terms in the two search facets below:

1. school\*, primary school\*, elementary school\*, secondary school\*, high school\*, middle school\*, student\*, pupil\*, child\*, lowachiever\*, underachiever\*
2. performance\*, academic\*, achieve\*, ability\*, learn\*, outcome\*, intelligence\*, read\*, literacy\*, math\*, develop\*, numeracy\*

Original searches were performed in January 2017 and yielded 162 results. The original searches covered annual meeting papers dating from 2010. Searches were limited to one year at a time. The updated searches in September 2018 yielded no new results.

### **German Educational Research Association**

<https://www.dgfe.de/zeitschrift-erziehungswissenschaft>

We hand-searched volumes (heft) 48-53 of the journal "Erziehungswissenschaft" (covering from 2014-2017).

Original hand-search were performed in January 2017 and yielded 47 results. The updated hand-search in September 2018 yielded new results.

### **NBER working paper series**

[https://www.nber.org/papers?page=1&perPage=50&sortBy=public\\_date](https://www.nber.org/papers?page=1&perPage=50&sortBy=public_date)

Searches were performed in the "Title, Number or Keyword" field. Searches were limited with the "Topics" filter "Health, Education, and Welfare". Original searches were limited from 1/1/1980-01/01/2017. We used a combination of terms in the two search facets below:

1. school\*, primary school\*, elementary school\*, secondary school\*, high school\*, middle school\*, student\*, pupil\*, child\*, lowachiever\*, underachiever\*
2. performance\*, academic\*, achieve\*, ability\*, learn\*, outcome\*, intelligence\*, read\*, literacy\*, math\*, develop\*, numeracy\*

Original searches were performed in January 2017 and yielded 492 results. The updated searches in September 2018 yielded 5 new results.

### **OpenGrey**

<http://www.opengrey.eu/search/>

Searches were performed in the main search field. We used a combination of terms in the two search facets below:

1. school\*, primary school\*, elementary school\*, secondary school\*, high school\*, middle school\*, student\*, pupil\*, child\*, lowachiev\*, underachiev\*
2. performance\*, academic\*, achieve\*, abilit\*, learn\*, outcome\*, intell\*, read\*, literac\*, math\*, develop\*, numerac\*

Original searches were performed in January 2017 and yielded 1427 results. Searches were not limited by year, but we only screened references from 1980-. The updated searches in September 2018 yielded no new results.

### **Best Evidence Encyclopedia**

<http://www.bestevidence.org/>

Best Evidence Encyclopedia is divided into subsections of “Program Reviews”. In each subsection there is links to abstracts, references and full reports. We screened all the subsections for relevant references. Furthermore, we selected relevant reviews to be citation tracked. The reviews selected in this manner is listed in the “Reviews used for citation tracking” section.

Original screening and citation tracking were performed in January 2017 and yielded 112 results. The updated searches in September 2018 yielded no new results.

### **Google Scholar**

<https://scholar.google.dk/>

We used the advanced search interface for the Google Scholar searches. We used the following search details inserted in the search template below.

| <b>Google Scholar Search Template</b> | <b>Insert terms/detalis below</b>               |
|---------------------------------------|-------------------------------------------------|
| All of the words                      | school intervention                             |
| Any of the words                      | underachiev lowachiev lowperform "special need" |
| Year of publication between           | 1980-2016                                       |
| Title words only                      | X                                               |
| Results/Retrieved                     | 179                                             |
| Search Date                           | 21/11-2016                                      |

The updated search in September 2018 yielded 30 new results.

### **Google**

We searched Google by using a combination of terms in the two search facets below:

1. school\*, primary school\*, elementary school\*, secondary school\*, high school\*, middle school\*, student\*, pupil\*, child\*, lowachiever\*, underachiever\*
2. performance\*, academic\*, achieve\*, ability\*, learn\*, outcome\*, intelligence\*, read\*, literacy\*, math\*, develop\*, numeracy\*
3. random\*, placebo, RCT\*, trial\*, group\*, quasi-experiment\*, cohort\*, case\* intervention\*, experiment\*, study\*, evaluation\*, treatment\*, longitudinal\*

The original searches were performed in January 2017, and yielded 150 results. We did not search Google in the 2018 update.

### Reviews used for citation tracking

The reference lists of the following reviews were screened for relevant records. Relevant records were obtained and screened in full text.

- Alfieri, L., Brooks, P. J., Aldrich, N. J., & Tenenbaum, H. R. (2011). Does discovery-based instruction enhance learning?. *Journal of Educational Psychology*, 103(1), 1-18.
- Cheung, A. C., & Slavin, R. E. (2012). How features of educational technology applications affect student reading outcomes: A meta-analysis. *Educational Research Review*, 7(3), 198-215.
- de Boer, H., Donker, A. S., & van der Werf, M. P. (2014). Effects of the attributes of educational interventions on students' academic performance: A meta-analysis. *Review of Educational Research*, 84(4), 509-545.
- Dexter, D. D., & Hughes, C. A. (2011). Graphic organizers and students with learning disabilities: A meta-analysis. *Learning Disability Quarterly*, 34(1), 51-72.
- Dietrichson, J., Bøg, M., Filges, T., & Klint Jørgensen, A-M. (2017). Academic interventions for elementary and middle school students with low socioeconomic status: A systematic review and meta-analysis. *Review of Educational Research*, 87(2), 243-282.
- Edmonds, M. S., Vaughn, S., Wexler, J., Reutebuch, C., Cable, A., Klingler Tackett, K., & Wick Schnakenberg, J. (2009). A synthesis of reading interventions and effects on reading comprehension outcomes for older struggling readers. *Review of Educational Research*, 79(1), 262-300.
- Elbaum, B., Vaughn, S., Tejero Hughes, M., & Watson Moody, S. (2000). How effective are one-to-one tutoring programs in reading for elementary students at risk for reading failure? A meta-analysis of the intervention research. *Journal of Educational Psychology*, 92(4), 605-619.
- Flynn, L. J., Zheng, X., & Swanson, H. L., (2012). Instructing struggling older readers: A selective meta-analysis of intervention research. *Learning Disabilities Research & Practice*, 27(1), 21-32.
- Forsman, H., & Vinnerljung, B. (2012). Interventions aiming to improve school achievements of children in out-of-home care: A scoping review. *Children and Youth Services Review*, 34(6), 1084-1091.
- Gersten, R., Chard, D. J., Jayanti, M., Baker, S. K., Morphy, P., & Flojo, P. (2009). Mathematics instruction for students with learning disabilities: A meta-analysis of instructional components. *Review of Educational Research*, 79(3), 1202-1242.
- Goodwin, A. P., & Ahn, S. (2010). A meta-analysis of morphological interventions: Effects on literacy achievement of children with literacy difficulties. *Annals of dyslexia*, 60(2), 183-208.
- Kyndt, E., Raes, E., Lismont, B., Timmers, F., Cascallar, E., & Dochy, F. (2013). A meta-analysis of the effects of face-to-face cooperative learning. Do recent studies falsify or verify earlier findings?. *Educational Research Review*, 10, 133-149.
- Reljić, G., Ferring, D., & Martin, R. (2015). A Meta-Analysis on the effectiveness of bilingual programs in Europe. *Review of Educational Research*, 85(1), 92-128.
- Ritter, G., Albin, G., Barnett, J., Blankenship, V., & Denny, G. (2006). The effectiveness of volunteer tutoring programs: A systematic review. *Campbell Systematic Reviews*, 7. DOI: 10.4073/csr.2006.7. Retrieved from <http://campbellcollaboration.org/lib/project/16/>.

- Robinson, D. R., Schofield, J. W., & Steers-Wentzell, K. L. (2005). Peer and cross-age tutoring in math: outcomes and their design implications. *Educational Psychology Review*, 17(4), 327-362.
- Scammaca, N. K., Roberts, G., Vaughn, S., & Stuebing, K. K. (2015). A meta-analysis of interventions for struggling readers in grades 4-12: 1980-2011. *Journal of Learning Disabilities*, 48(4), 369-390.
- Slavin, R. E., Cheung, A., Groff, C., & Lake, C. (2008). Effective reading programs for middle and high schools: A best-evidence synthesis. *Reading Research Quarterly*, 43(3), 290-322.
- Slavin, R. E., & Lake, C. (2008). Effective programs in elementary mathematics: A best-evidence synthesis. *Review of Educational Research*, 78(3), 427-515.
- Slavin, R. E., Lake, C., & Groff, C. (2009). Effective programs in middle and high school mathematics: A best-evidence synthesis. *Review of Educational Research*, 79(2), 839-911.
- Slavin, R. E., Lake, C., Chambers, B., Cheung, A., & Davis, S. (2009). Effective reading programs for the elementary grades: A best-evidence synthesis. *Review of Educational Research*, 79(4), 1391-1466.
- Slavin, R. E., Lake, C., Davis, S., & Madden, N. A. (2011). Effective programs for struggling readers: A best-evidence synthesis. *Educational Research Review*, 6(1), 1-26.
- Wilson, S., Tanner-Smith, E. E., Lipsey, M. W., Steinka-Fry, K., & Morrison, J. (2011). Dropout prevention and intervention programs: Effects on school completion and dropout among school-aged children and youth. *Campbell Systematic Reviews*, 7 Retrieved from <http://www.campbellcollaboration.org/lib/project/158/>.
- Wanzek, J., Vaughn, S., Wexler, J., Swanson, E. A., Edmonds, M., & Kim, A-H., 2006. A synthesis of spelling and reading interventions and their effects on the spelling outcomes of students with LD. *Journal of Learning Disabilities*, 39(2), 528-543.
- Wanzek, J., Vaughn, S., Wexler, J., Swanson, E. A., Edmonds, M., & Kim, A-H., 2006. A synthesis of spelling and reading interventions and their effects on the spelling outcomes of students with LD. *Journal of Learning Disabilities*, 39(2), 528-543.
